# Supplementary material for: Structure–Activity Relationship of Phytotoxic Natural 10-Membered Lactones and Their Semisynthetic Derivatives
Source: MDPI journal article supplement (doi:10.3390/jof7100829), 2021-10-03
Supplement: s1 [file s1]

# Structure–Activity Relationship of Phytotoxic Natural 10-Membered Lactones and Their Semisynthetic Derivatives

Anna Dalinova<sup>\*1</sup>, Anatoly Fedorov<sup>1</sup>, Vsevolod Dubovik<sup>1</sup>, Olga Voitsekhovskaja<sup>2</sup>, Elena Tyutereva<sup>2</sup>, Sergey Smirnov<sup>3</sup>, Dmitry Kochura<sup>4</sup>, Leonid Chisty<sup>4</sup>, Igor Senderskiy<sup>1</sup>, Alexander Berestetskiy<sup>1</sup>

<sup>1</sup> All-Russian Institute of Plant Protection, Saint Petersburg, Pushkin 196608, Russia; adalinova@vizr.spb.ru (A.D.); afedorov@vizr.spb.ru (A.F.); vdubovik@vizr.spb.ru (V.D.); senderskiy@mail.ru (I.S.);

aberestetskiy@vizr.spb.ru (A.B.)

<sup>2</sup> Komarov Botanical Institute, Russian Academy of Sciences, Saint Petersburg 197376, Russia; ovoitse@binran.ru (O.V.); tuterlena@mail.ru (E.T.)

<sup>3</sup> St. Petersburg State University, Saint Petersburg 198504, Russia; sergey.smirnov@spbu.ru

<sup>4</sup> Research Institute of Hygiene, Occupational Pathology and Human Ecology, Federal Medical Biological Agency, Saint-Petersburg 188663, Russia; 89117050635@yandex.ru (D.K.); mehrn.q2@gmail.com (L.C.)

\* Correspondence: adalinova@vizr.spb.ru

**Figure S1** – <sup>1</sup>H NMR spectrum of compound **5**

**Figure S2** – <sup>13</sup>C NMR spectrum of compound **5**

**Figure S3** – COSY spectrum of compound **5**

**Figure S4** – HMBC spectrum of compound **5**

**Figure S5** – HSQC spectrum of compound **5**

**Figure S6** – TOCSY spectrum of compound **5**

**Figure S7** – ESIMS of compound **5** recorded in positive ion mode

**Figure S8** – <sup>1</sup>H NMR spectrum of compound **6**

**Figure S9** – <sup>13</sup>C NMR spectrum of compound **6**

**Figure S10** – DEPT spectrum of compound **6**

**Figure S11** – COSY spectrum of compound **6**

**Figure S12** – HMBC spectrum of compound **6**

**Figure S13** – HSQC spectrum of compound **6**

**Figure S14** – ESIMS of compound **6** recorded in positive ion mode

**Figure S15** – <sup>1</sup>H NMR spectrum of compound **7**

**Figure S16** – <sup>13</sup>C NMR spectrum of compound **7**

**Figure S17** – COSY spectrum of compound **7**

**Figure S18** – NOESY spectrum of compound **7**

**Figure S19** – HMBC spectrum of compound **7**

**Figure S20** – HSQC spectrum of compound **7**

**Figure S21** – ESIMS of compound **7** recorded in positive ion mode

**Figure S22** –  $^1\text{H}$  NMR spectrum of compound **8**

**Figure S23** –  $^{13}\text{C}$  NMR spectrum of compound **8**

**Figure S24** – COSY spectrum of compound **8**

**Figure S25** – NOESY spectrum of compound **8**

**Figure S26** – HMBC spectrum of compound **8**

**Figure S27** – HSQC spectrum of compound **8**

**Figure S28** – ESIMS of compound **8** recorded in positive ion mode

**Figure S29** –  $^1\text{H}$  NMR spectrum of compound **9**

**Figure S30** –  $^{13}\text{C}$  NMR spectrum of compound **9**

**Figure S31** – COSY spectrum of compound **9**

**Figure S32** – HMBC spectrum of compound **9**

**Figure S33** – HSQC spectrum of compound **9**

**Figure S34** – TOCSY spectrum of compound **9**

**Figure S35** – ESIMS of compound **9** recorded in positive ion mode

**Figure S36** –  $^1\text{H}$  NMR spectrum of compound **10**

**Figure S37** –  $^{13}\text{C}$  NMR spectrum of compound **10**

**Figure S38** – COSY spectrum of compound **10**

**Figure S39** – HMBC spectrum of compound **10**

**Figure S40** – HSQC spectrum of compound **10**

**Figure S41** – ESIMS of compound **10** recorded in positive ion mode

**Figure S42** –  $^1\text{H}$  NMR spectrum of compound **11**

**Figure S43** –  $^{13}\text{C}$  NMR spectrum of compound **11**

**Figure S44** – COSY spectrum of compound **11**

**Figure S45** – HMBC spectrum of compound **11**

**Figure S46** – HSQC spectrum of compound **11**

**Figure S47** – ESIMS of compound **11** recorded in positive ion mode

**Figure S48** – Phytotoxic activity of compounds **1** – **11** on sowthistle punctured leaf discs at 120 hours after treatment

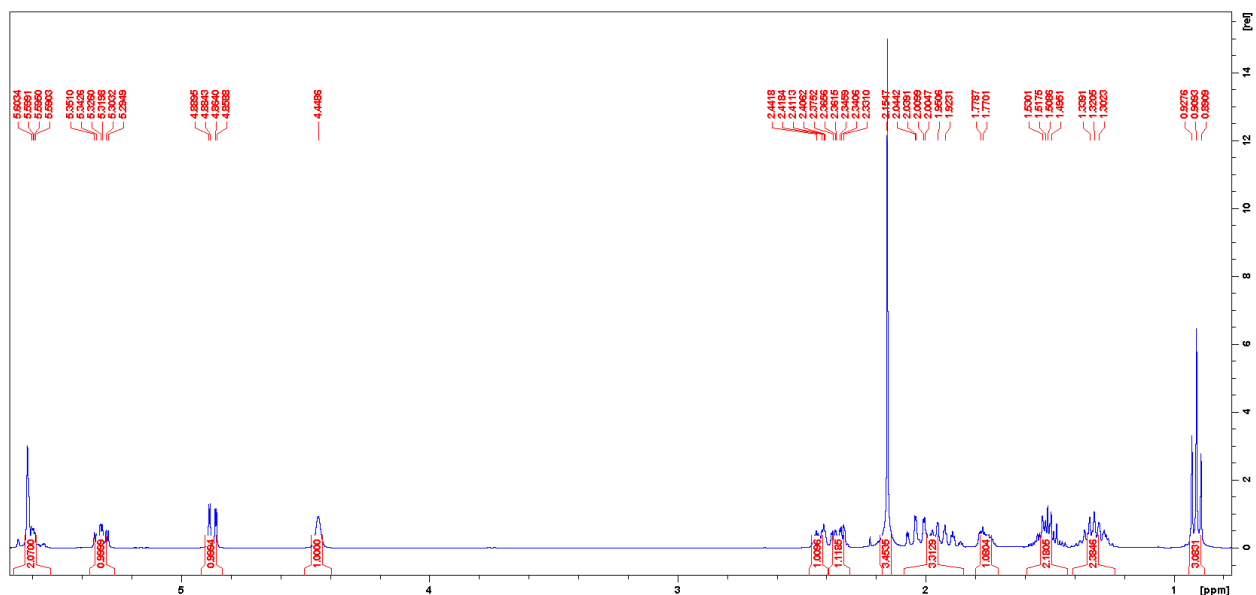

**Figure S1** – <sup>1</sup>H NMR spectrum of compound **5**

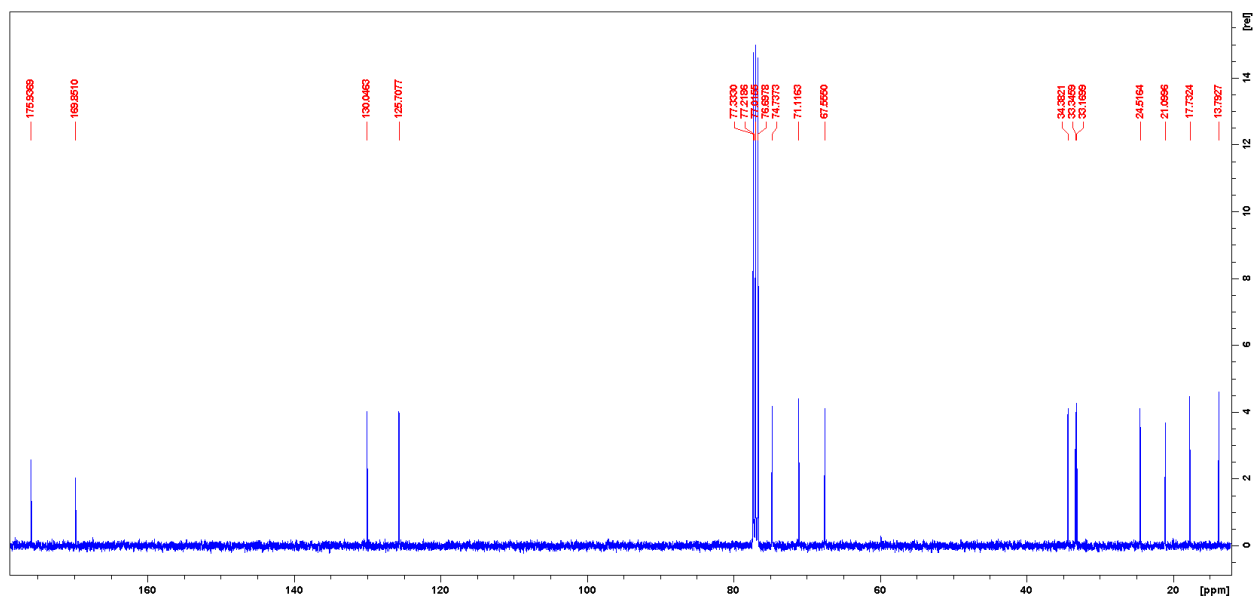

**Figure S2** – <sup>13</sup>C NMR spectrum of compound **5**

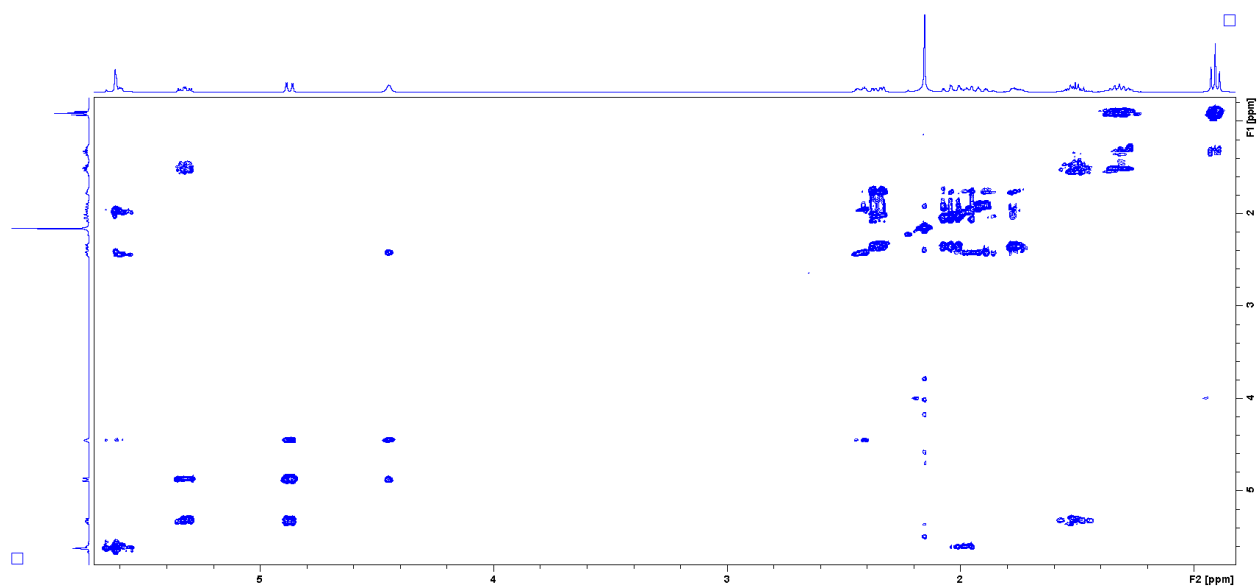

**Figure S3** – COSY spectrum of compound **5**

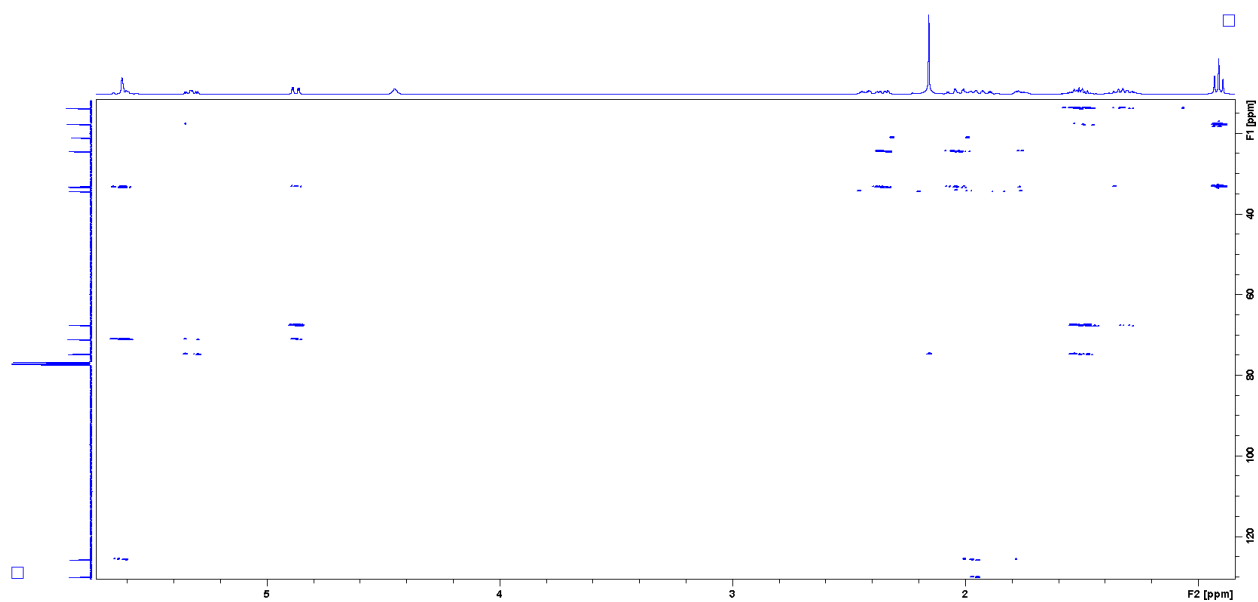

**Figure S4** – HMBC spectrum of compound **5**

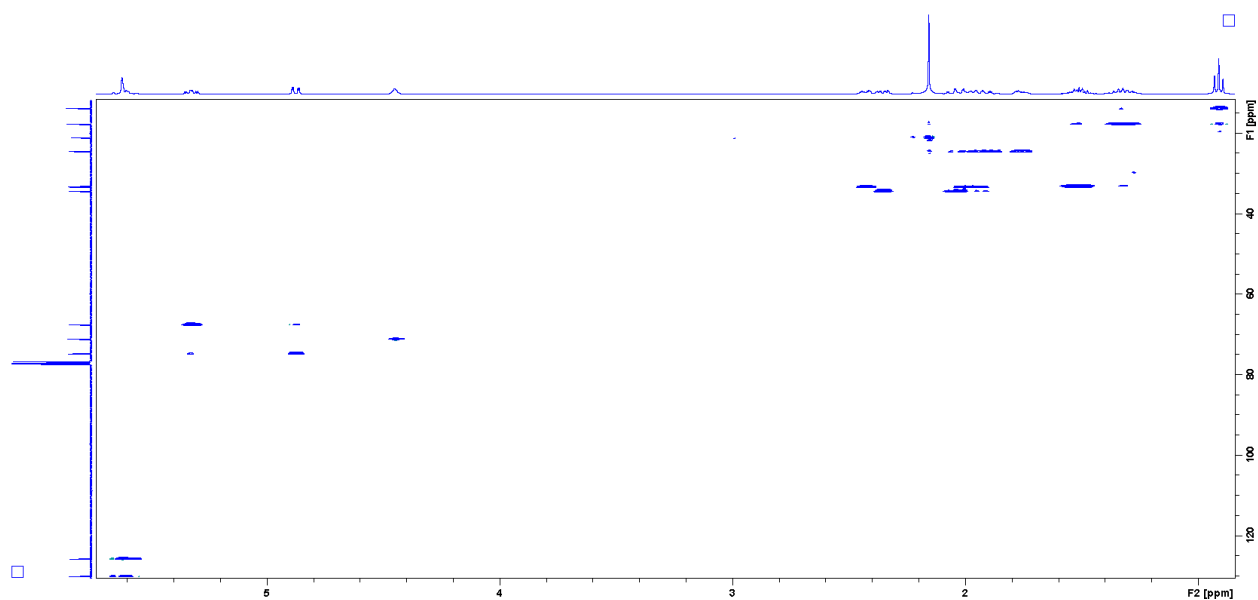

**Figure S5** – HSQC spectrum of compound **5**

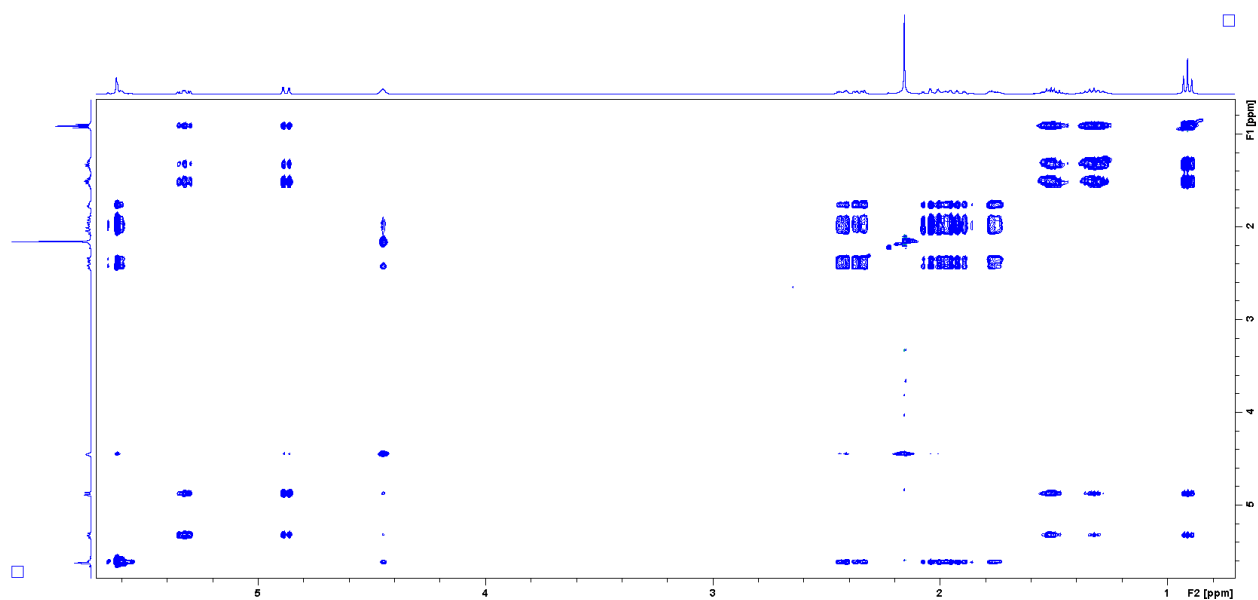

**Figure S6** – TOCSY spectrum of compound **5**

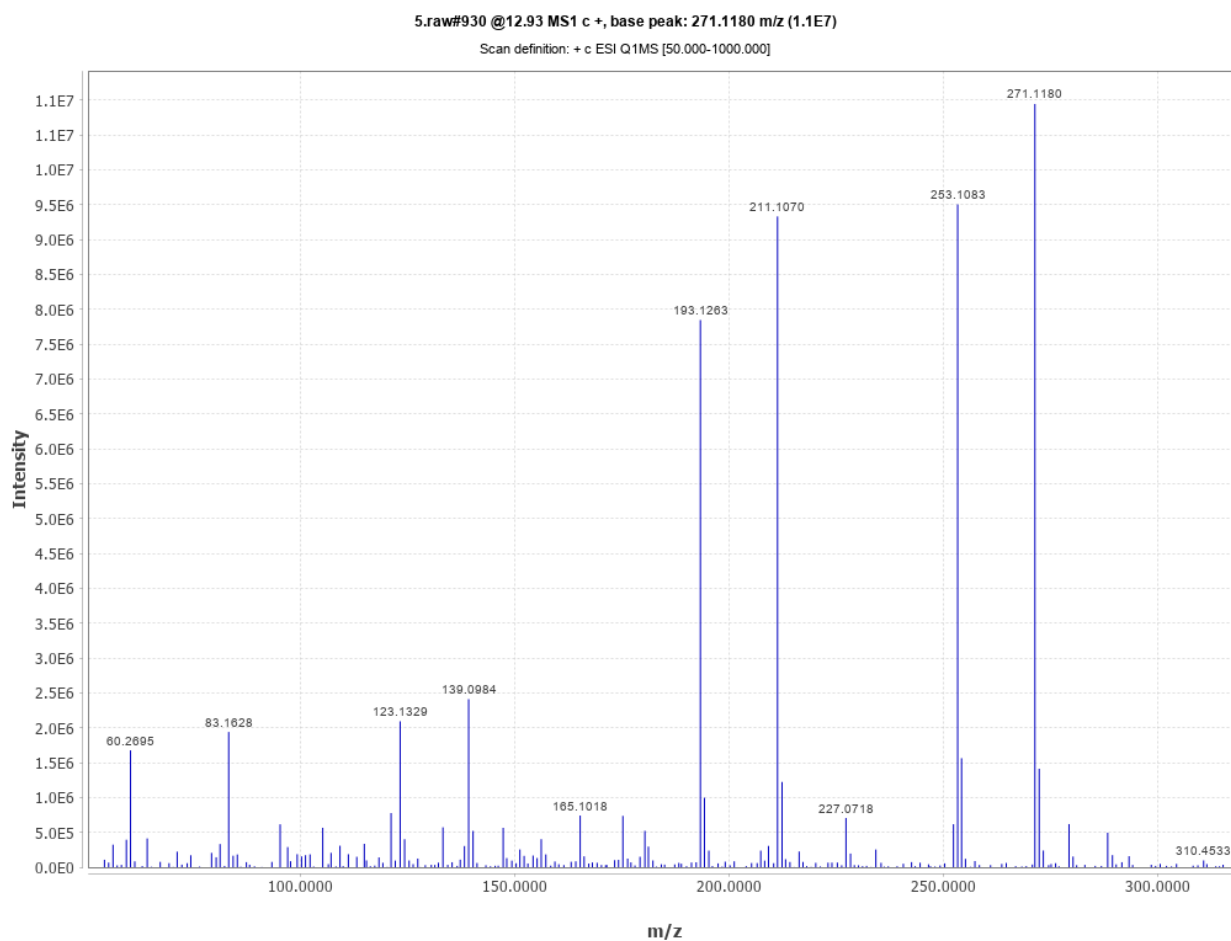

**Figure S7** – ESIMS of compound **5** recorded in positive ion mode

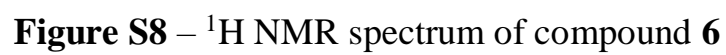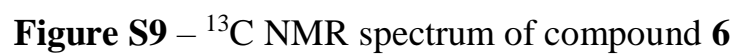

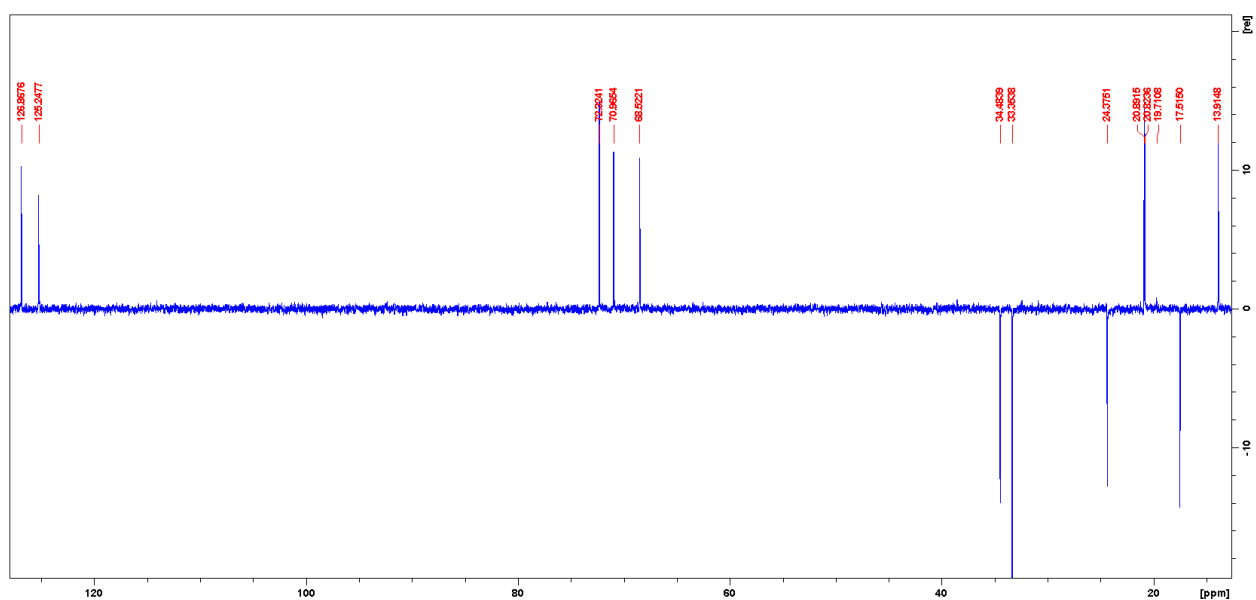

**Figure S10** – DEPT spectrum of compound **6**

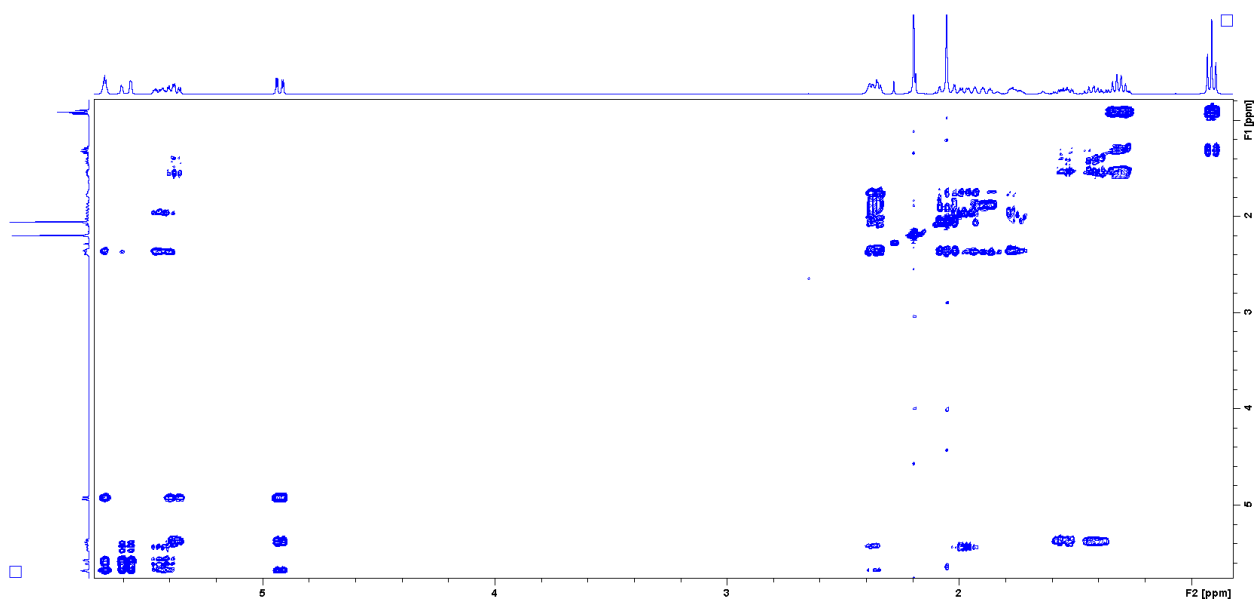

**Figure S11** – COSY spectrum of compound **6**



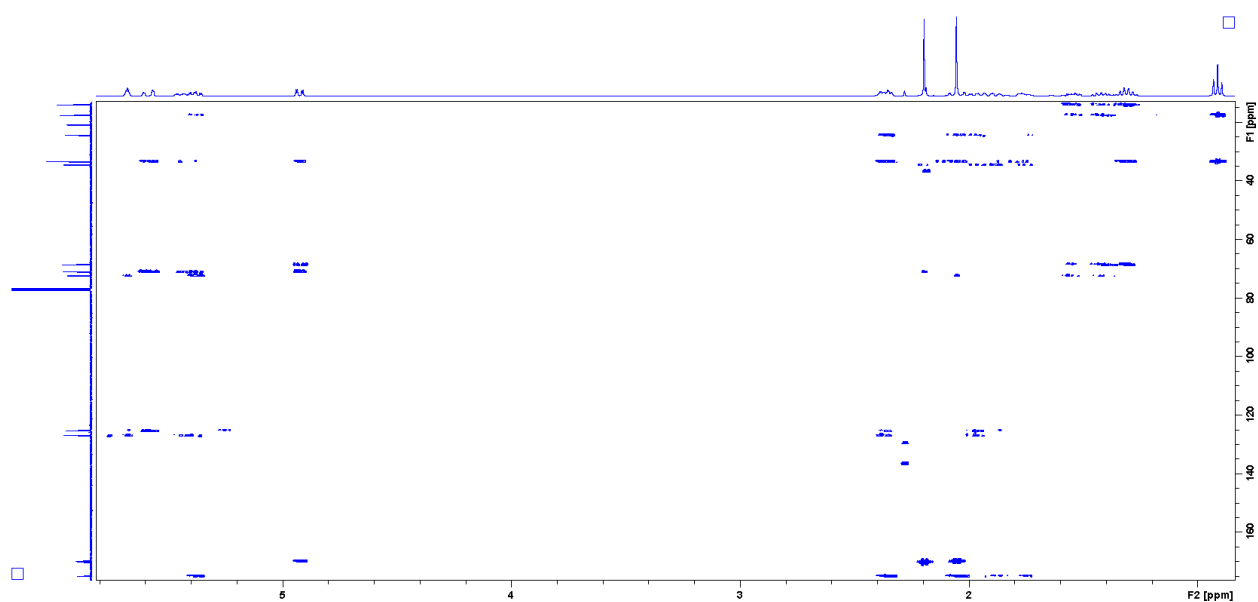

**Figure S12** – HMBC spectrum of compound **6**

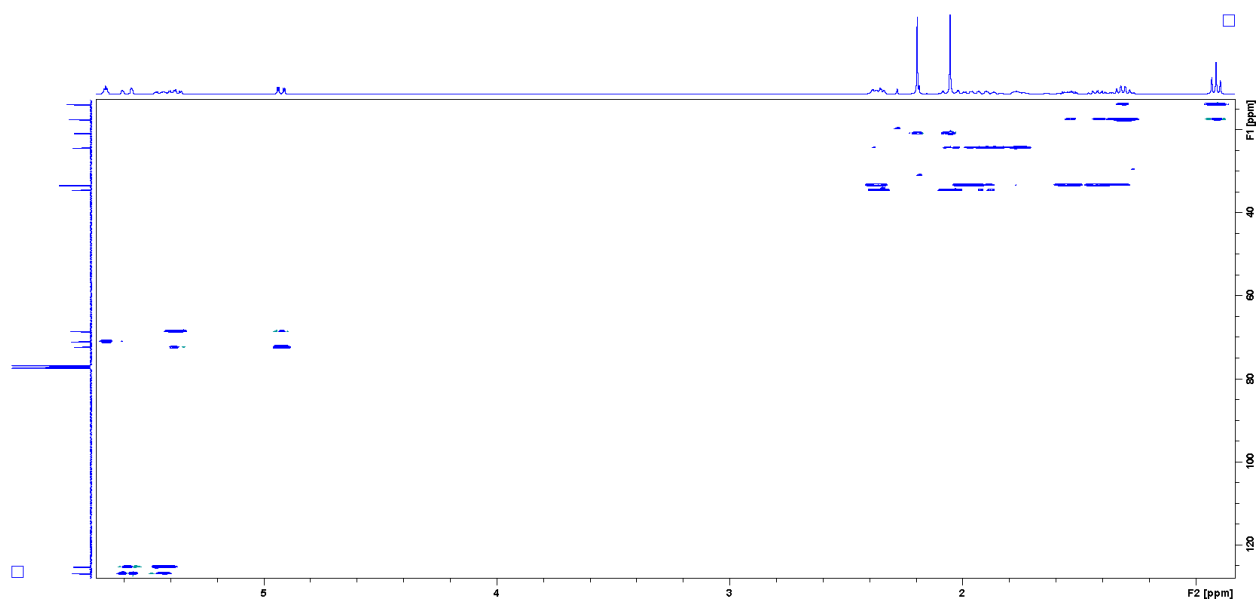

**Figure S13** – HSQC spectrum of compound **6**

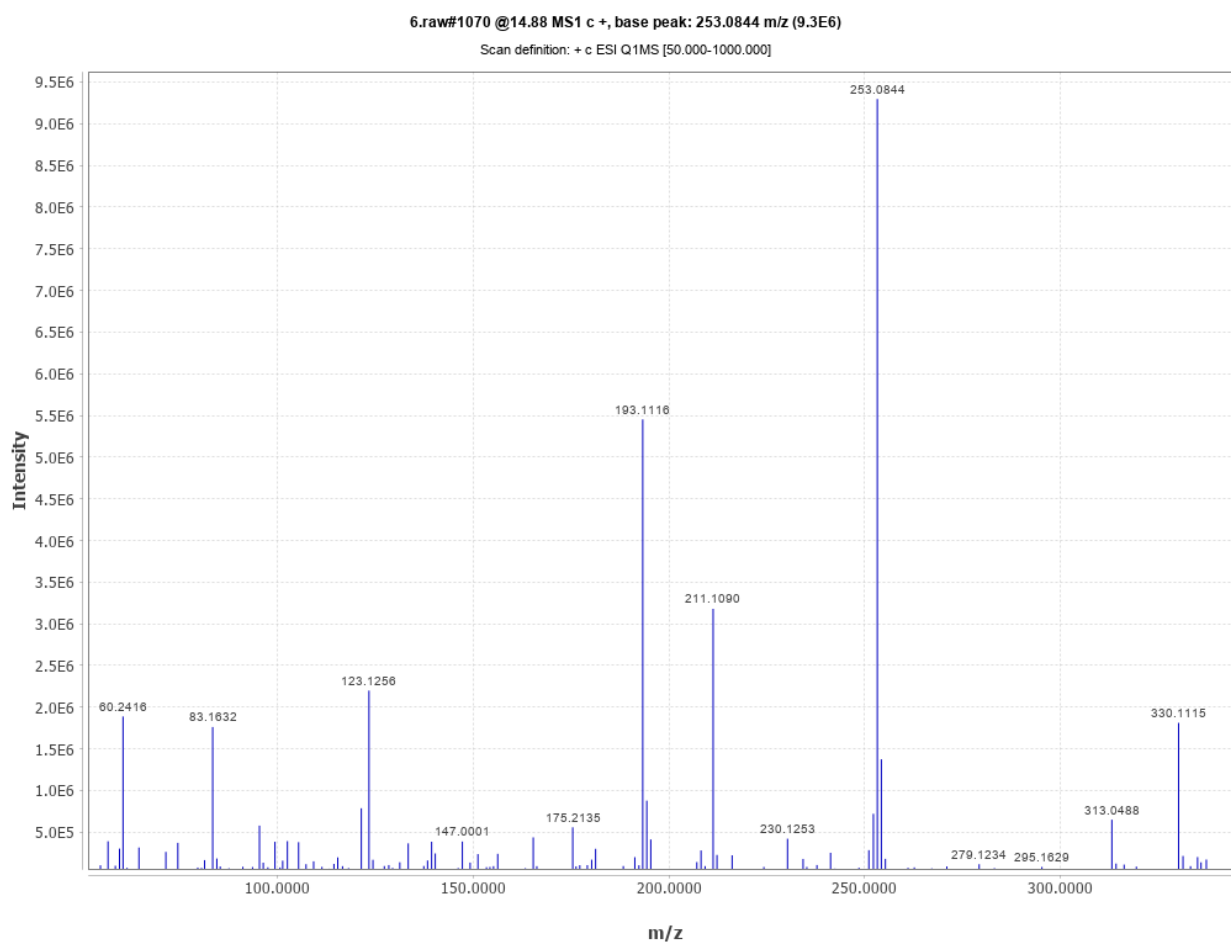

**Figure S14** – ESIMS of compound **6** recorded in positive ion mode

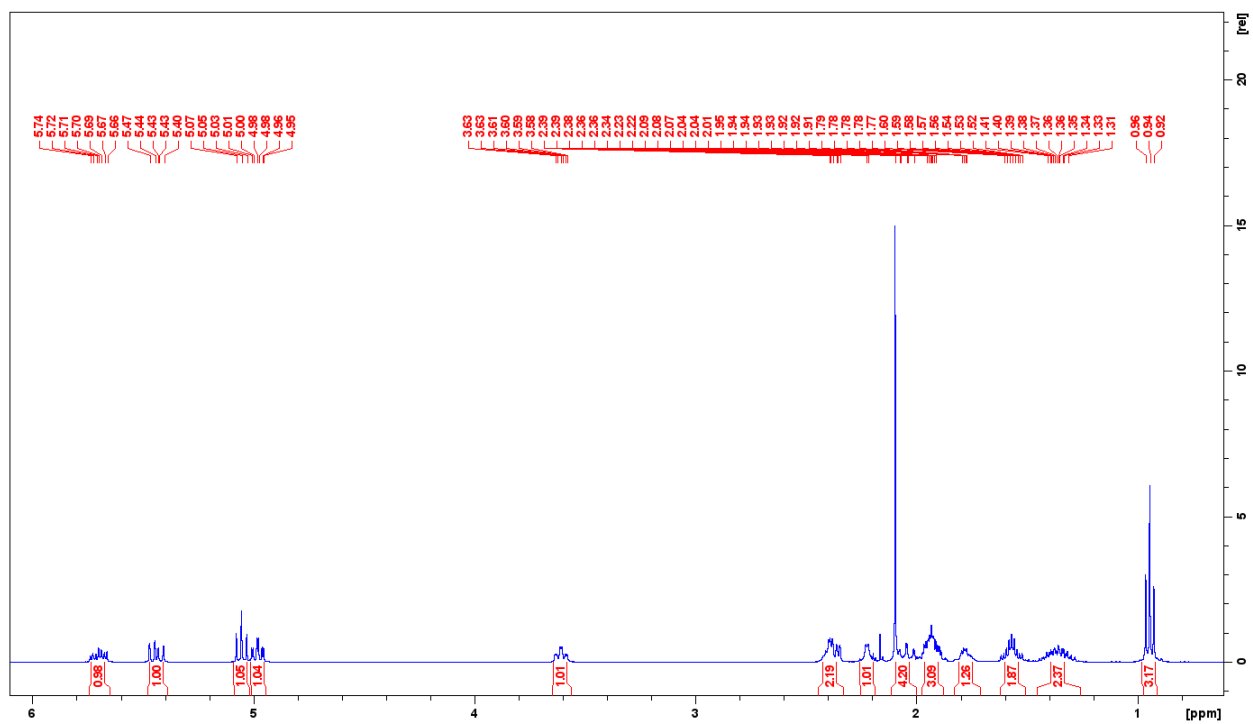

**Figure S15** – <sup>1</sup>H NMR spectrum of compound **7**

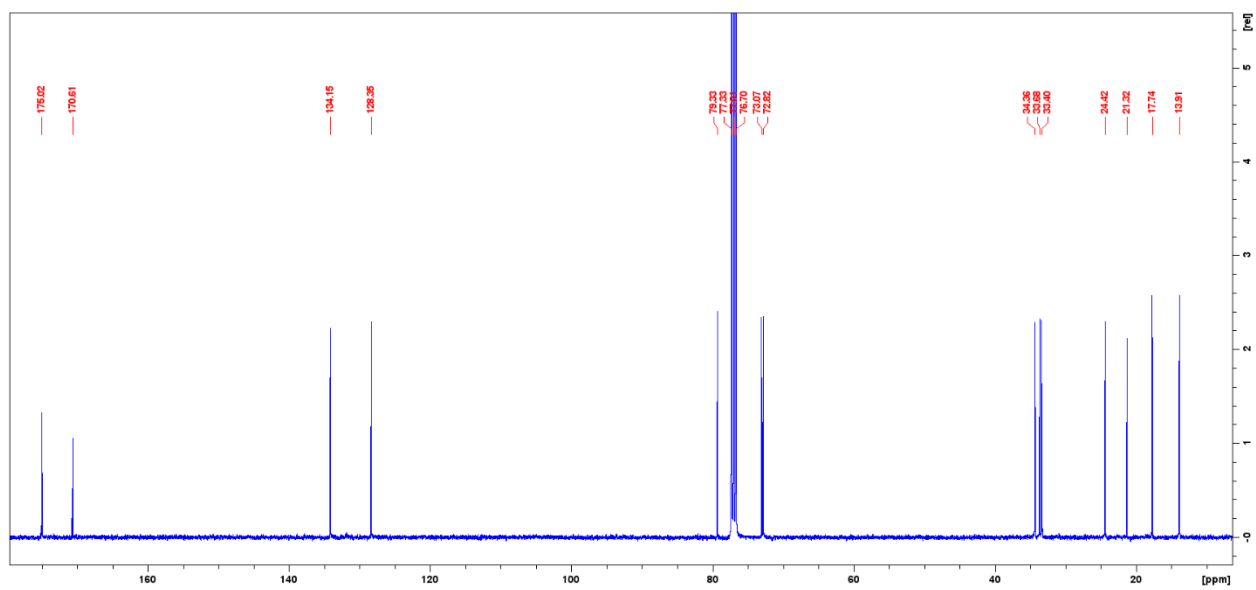

**Figure S16** – <sup>13</sup>C NMR spectrum of compound **7**

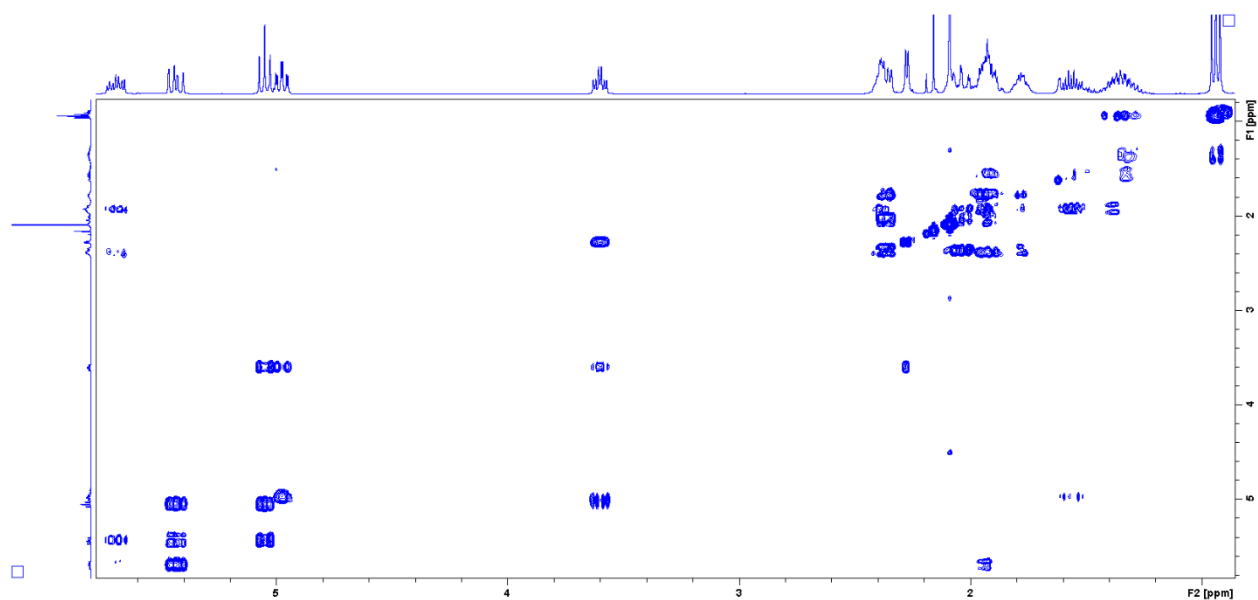

**Figure S17** – COSY spectrum of compound **7**

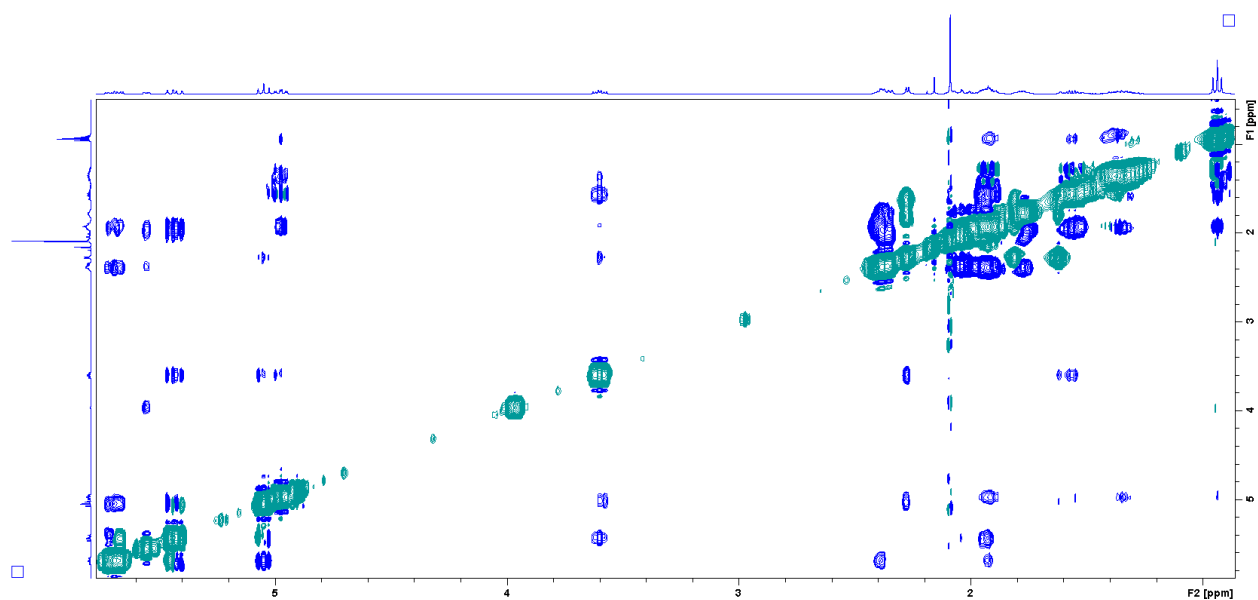

**Figure S18** – NOESY spectrum of compound **7**

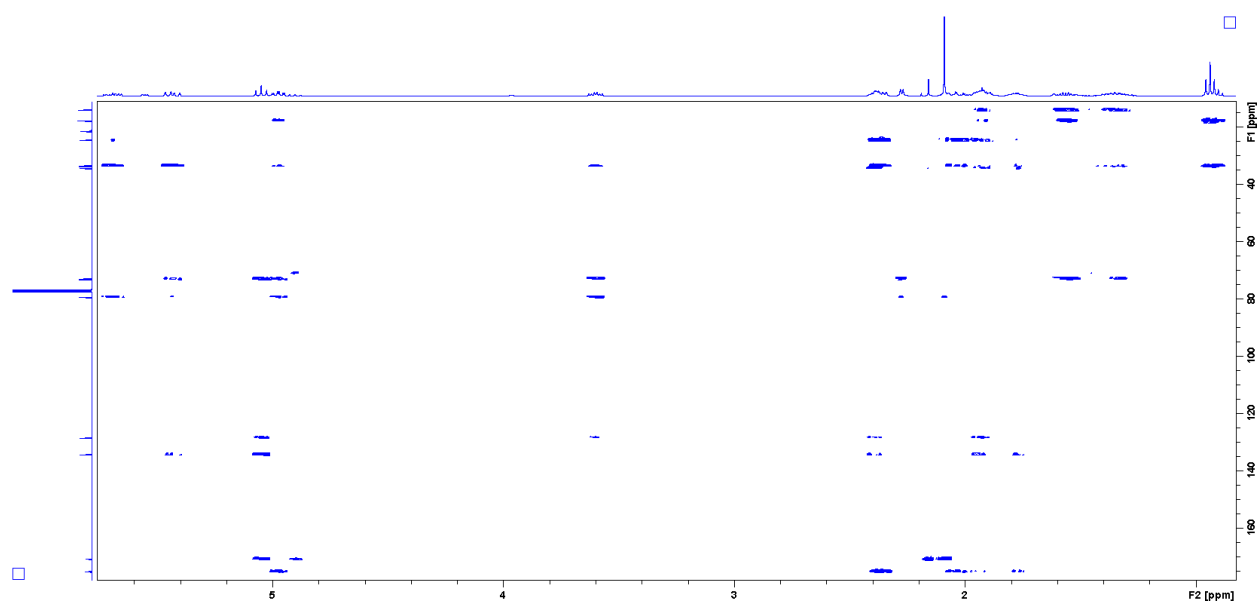

**Figure S19** – HMBC spectrum of compound **7**

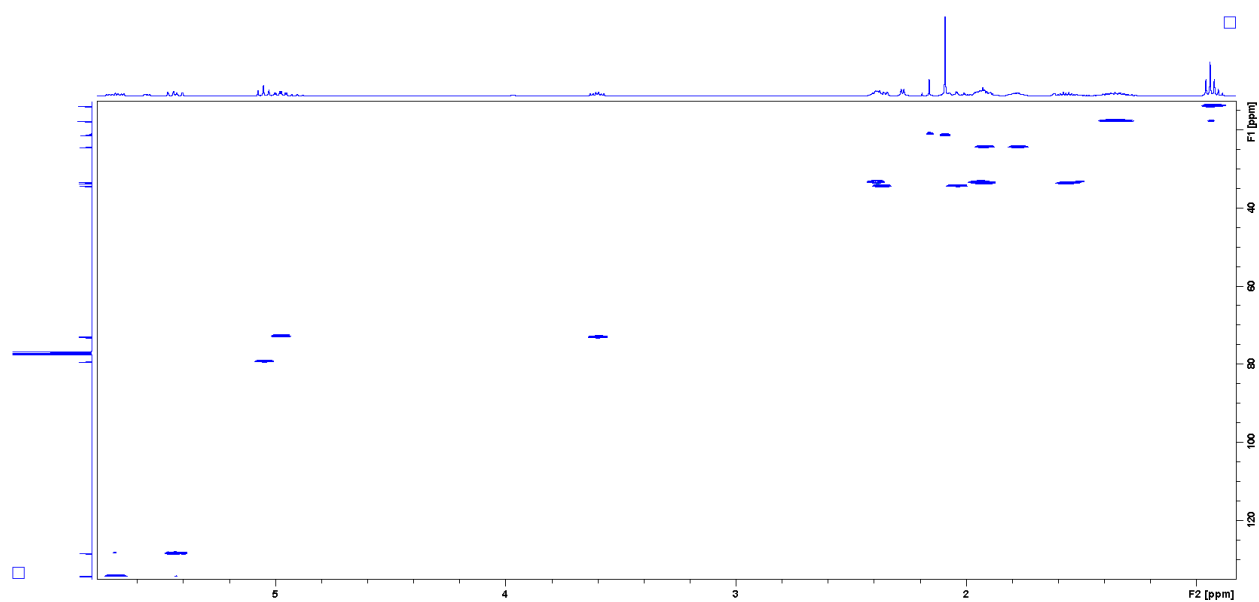

**Figure S20** – HSQC spectrum of compound **7**

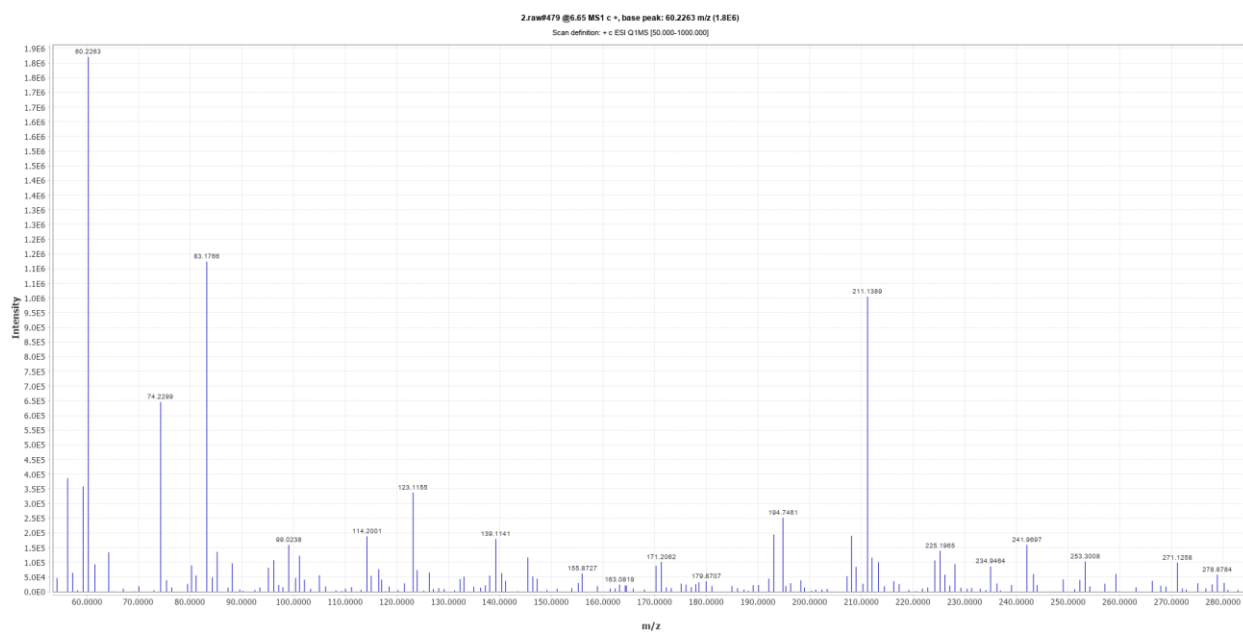

**Figure S21** – ESIMS of compound **7** recorded in positive ion mode

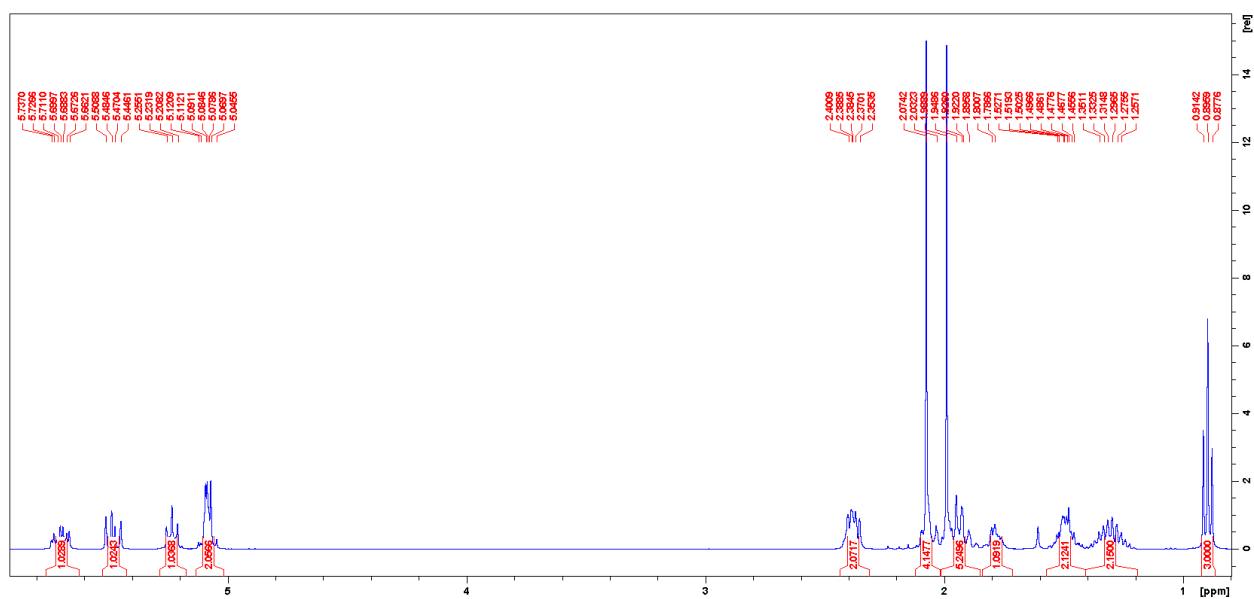

**Figure S22** –  $^1\text{H}$  NMR spectrum of compound **8**

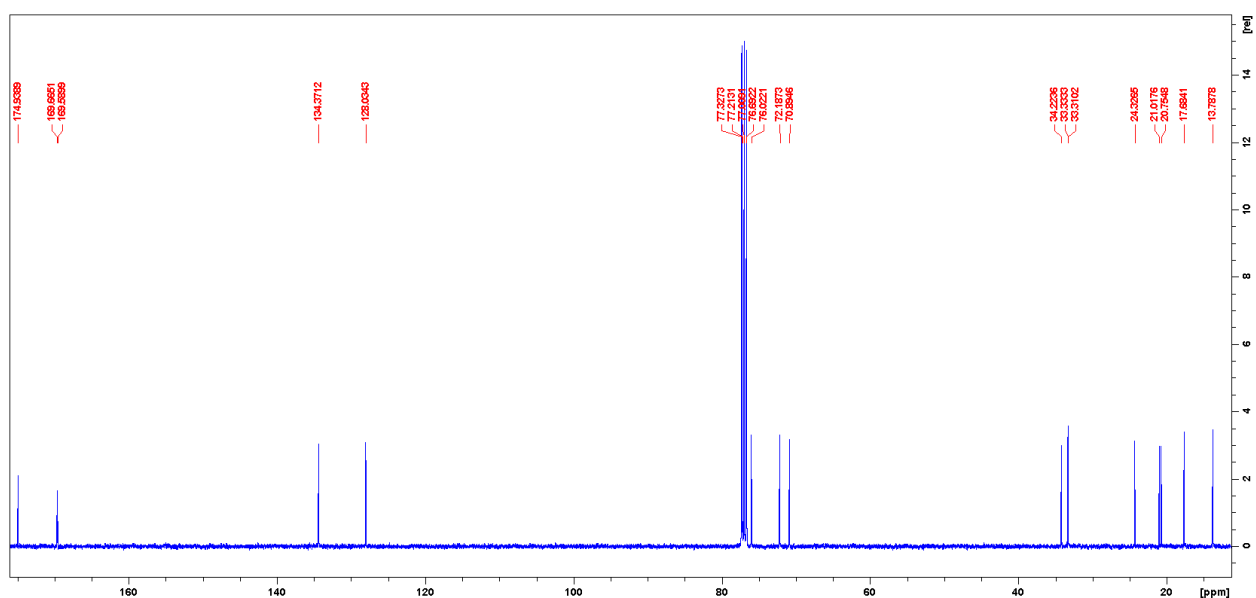

**Figure S23** – <sup>13</sup>C NMR spectrum of compound **8**

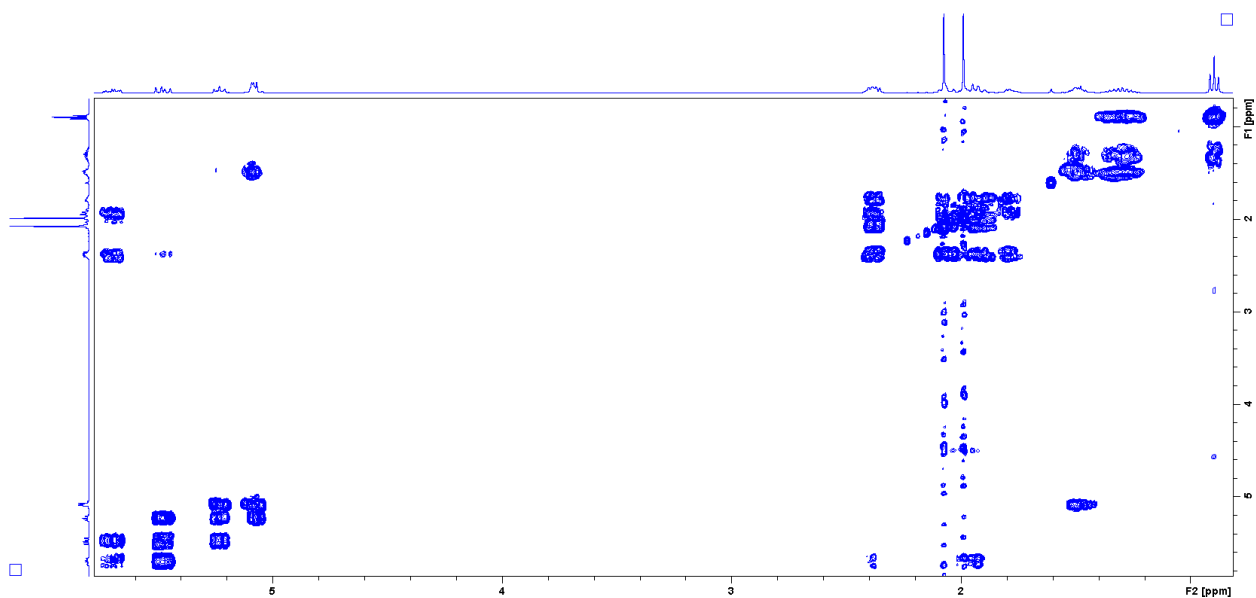

**Figure S24** – COSY spectrum of compound **8**

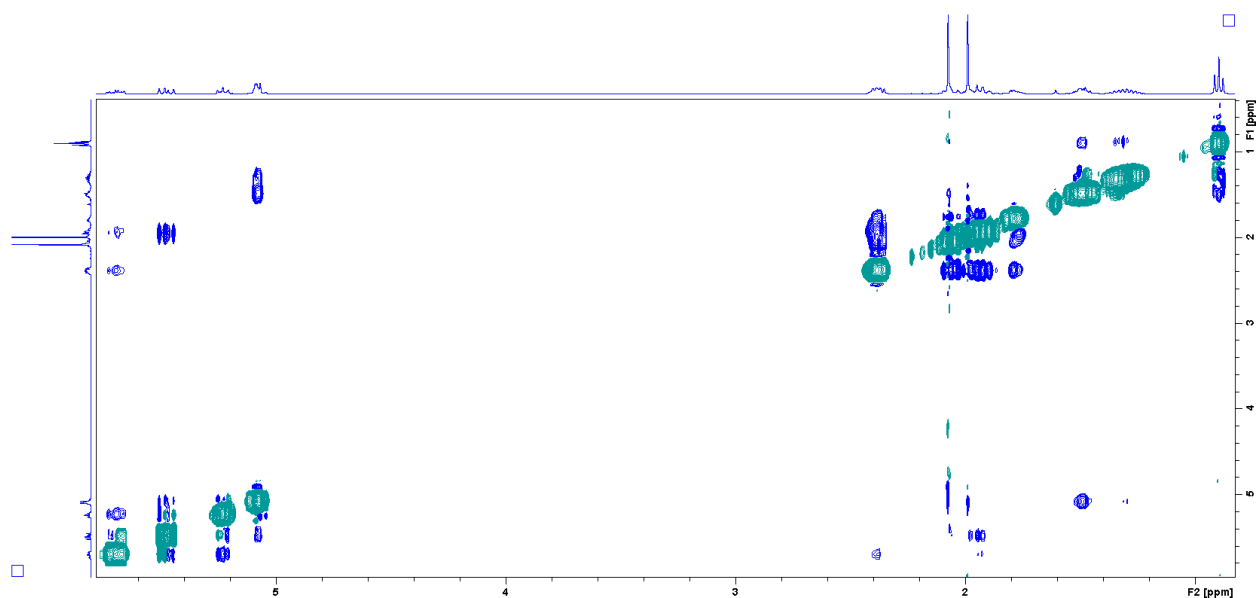

**Figure S25** – NOESY spectrum of compound **8**

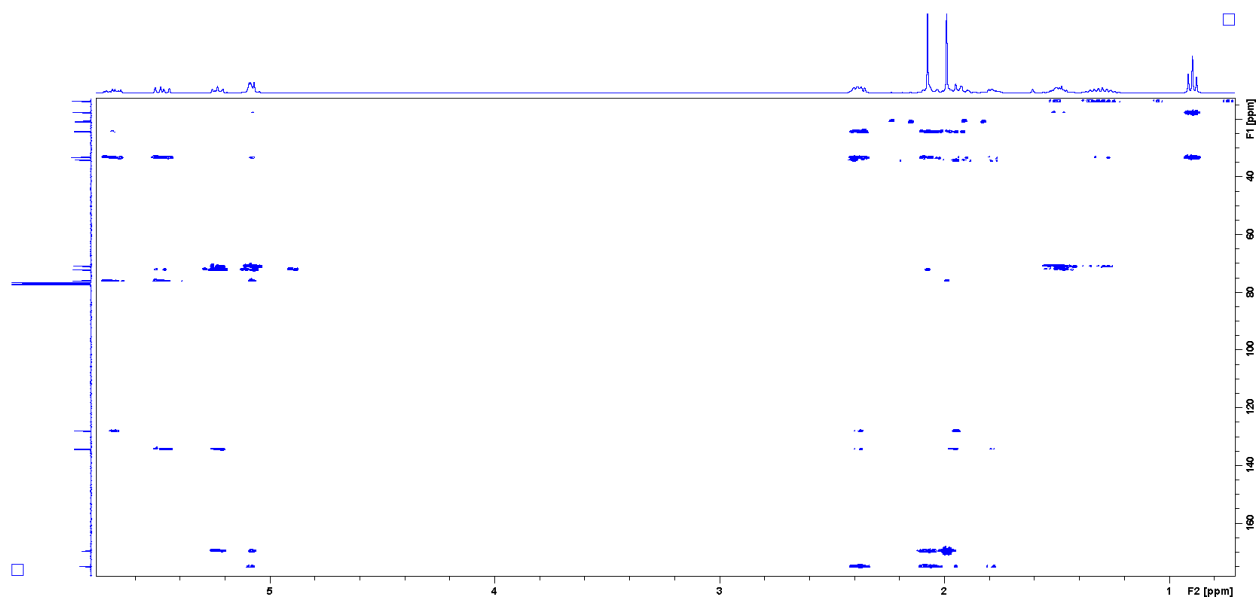

**Figure S26** – HMBC spectrum of compound **8**



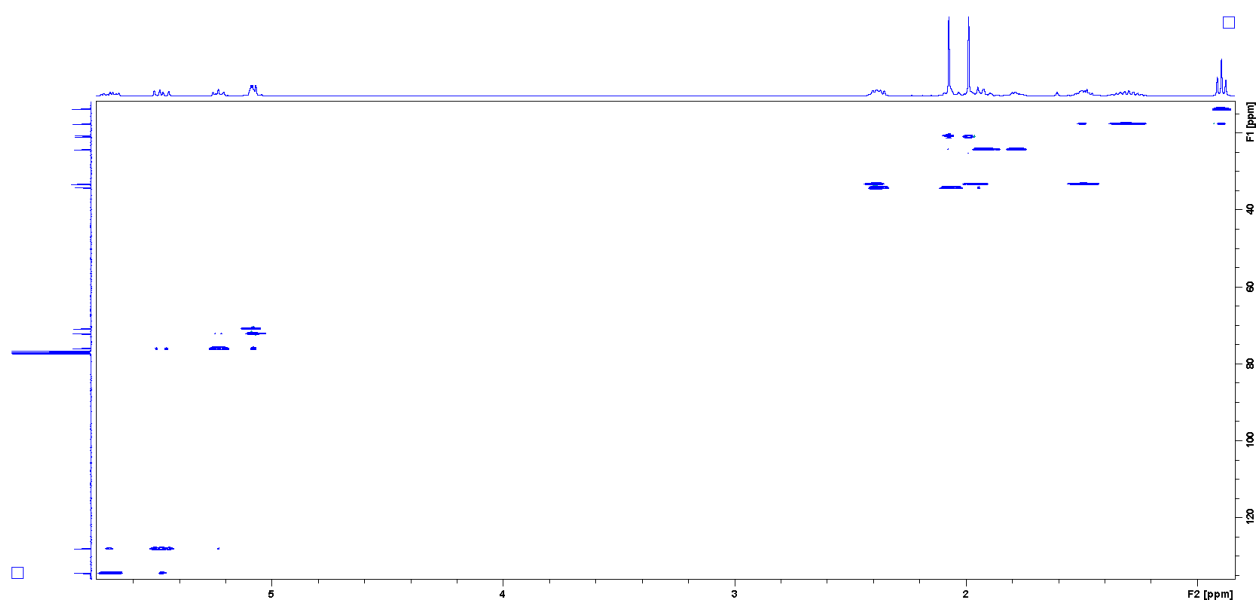

**Figure S27** – HSQC spectrum of compound **8**

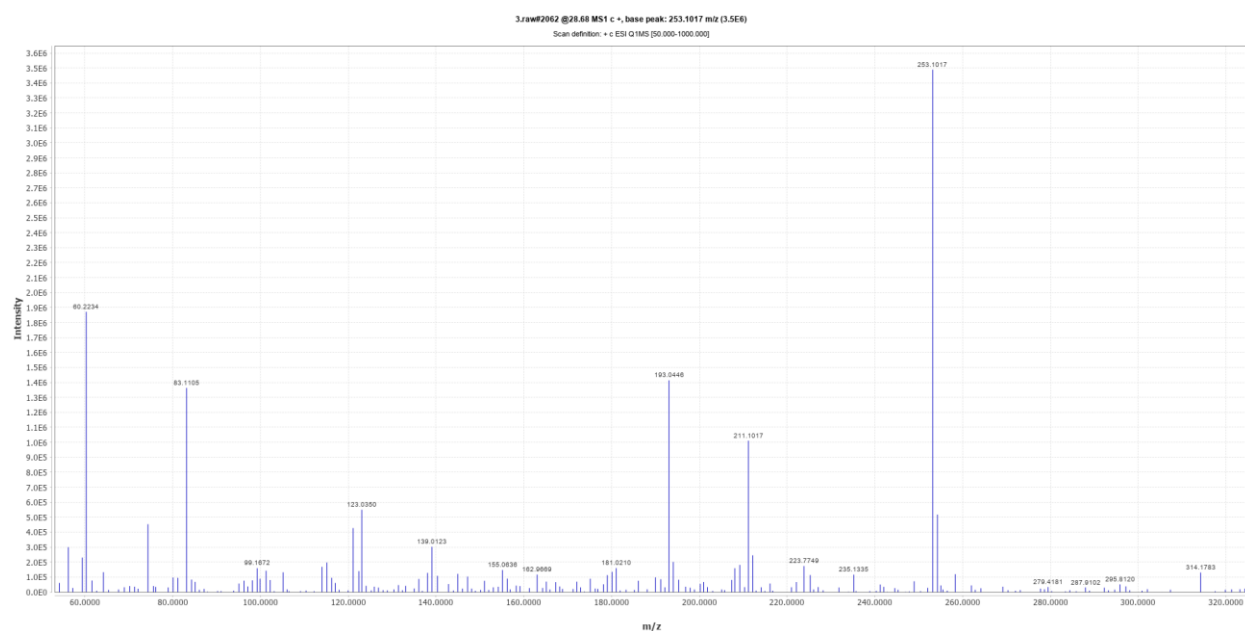

**Figure S28** – ESIMS of compound **8** recorded in positive ion mode

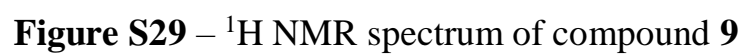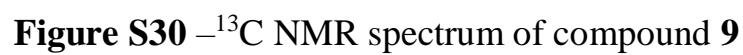

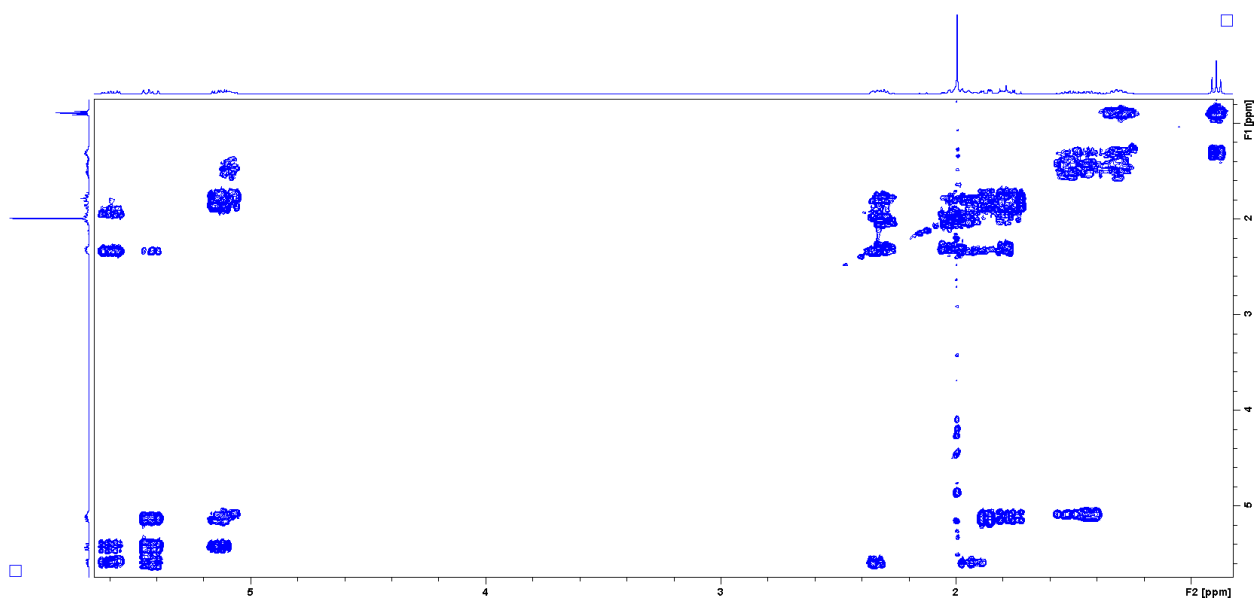

**Figure S31** – COSY spectrum of compound **9**

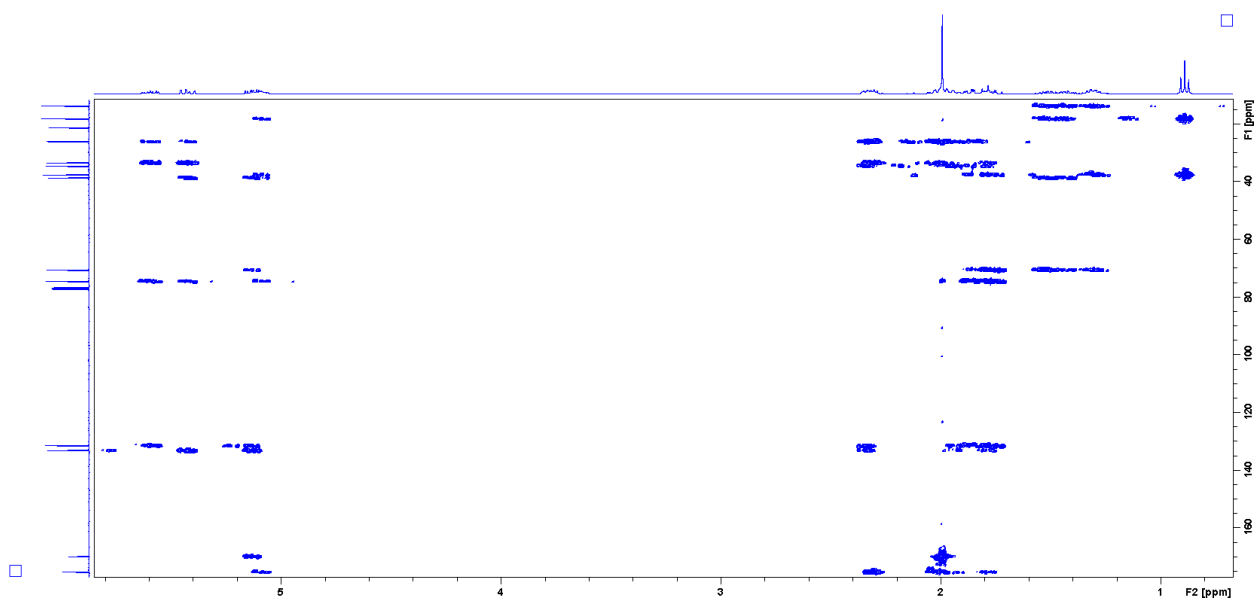

**Figure S32** – HMBC spectrum of compound **9**

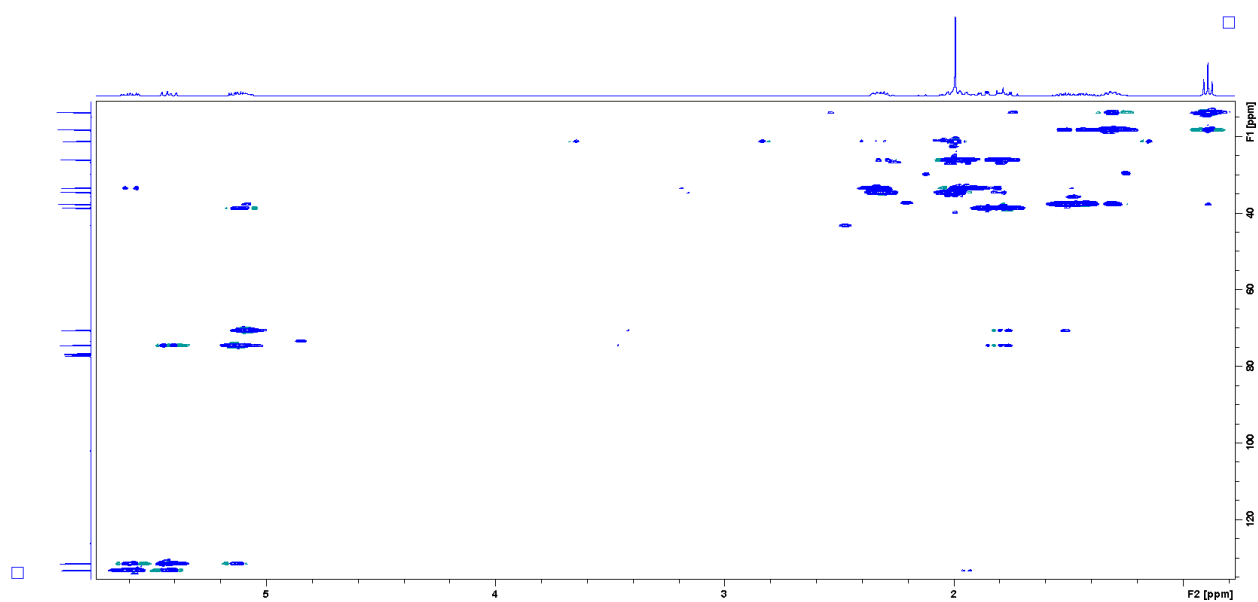

**Figure S33** – HSQC spectrum of compound **9**

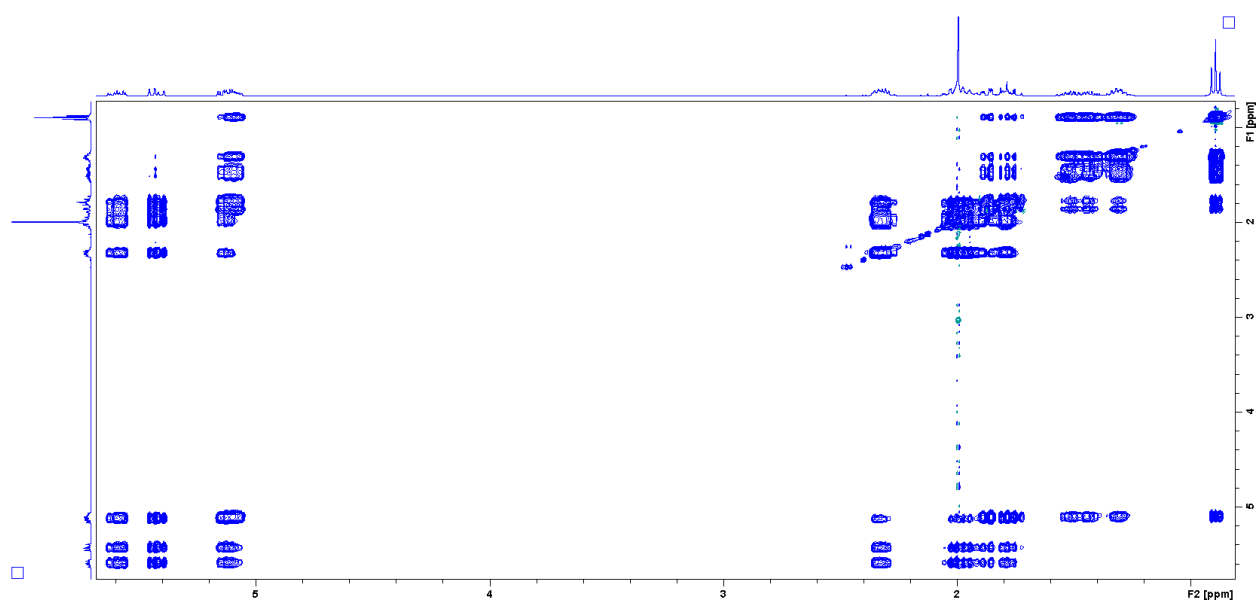

**Figure S34** – TOCSY spectrum of compound **9**

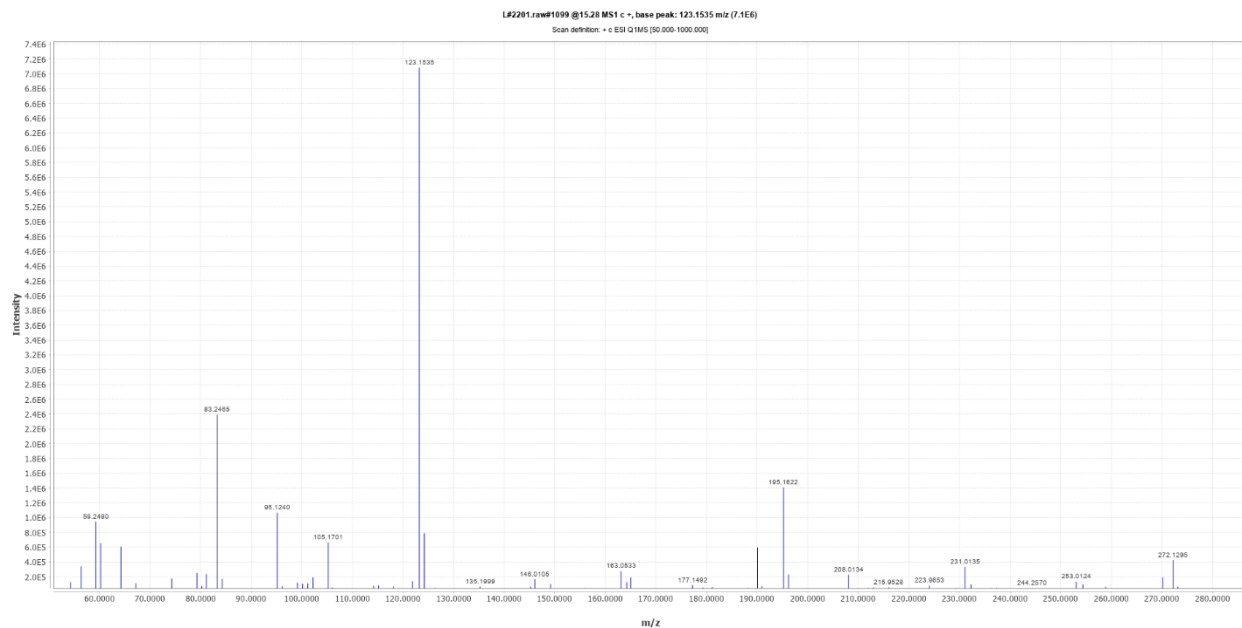

**Figure S35** – ESIMS of compound **9** recorded in positive ion mode

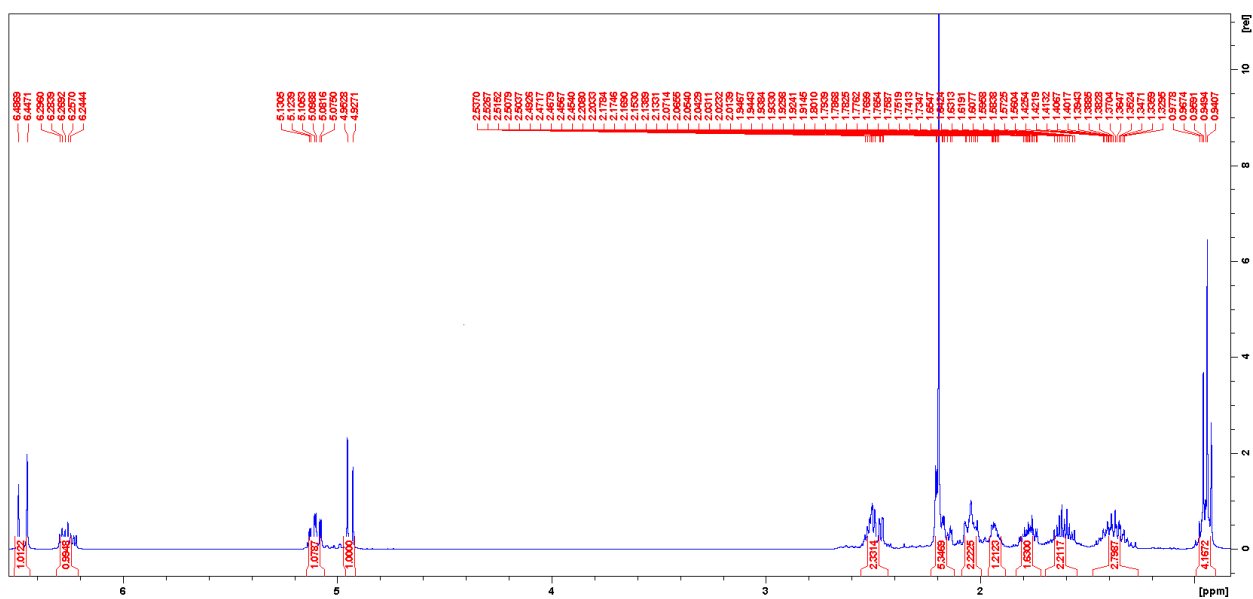

**Figure S36** –  $^1\text{H}$  NMR spectrum of compound **10**

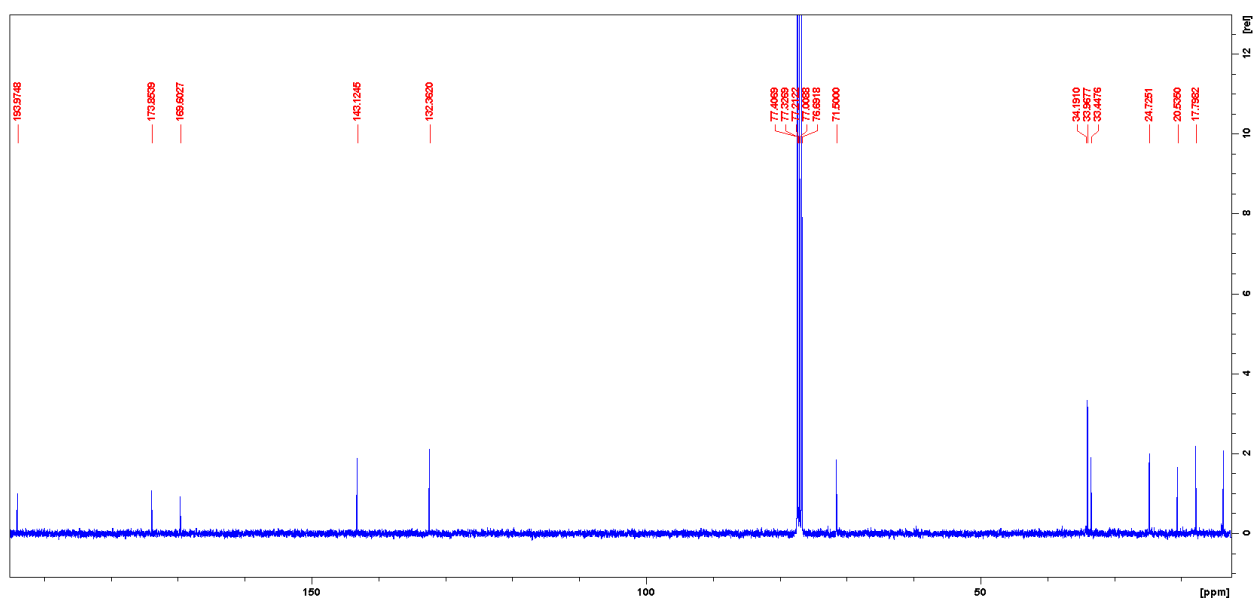

**Figure S37** –  $^{13}\text{C}$  NMR spectrum of compound **10**

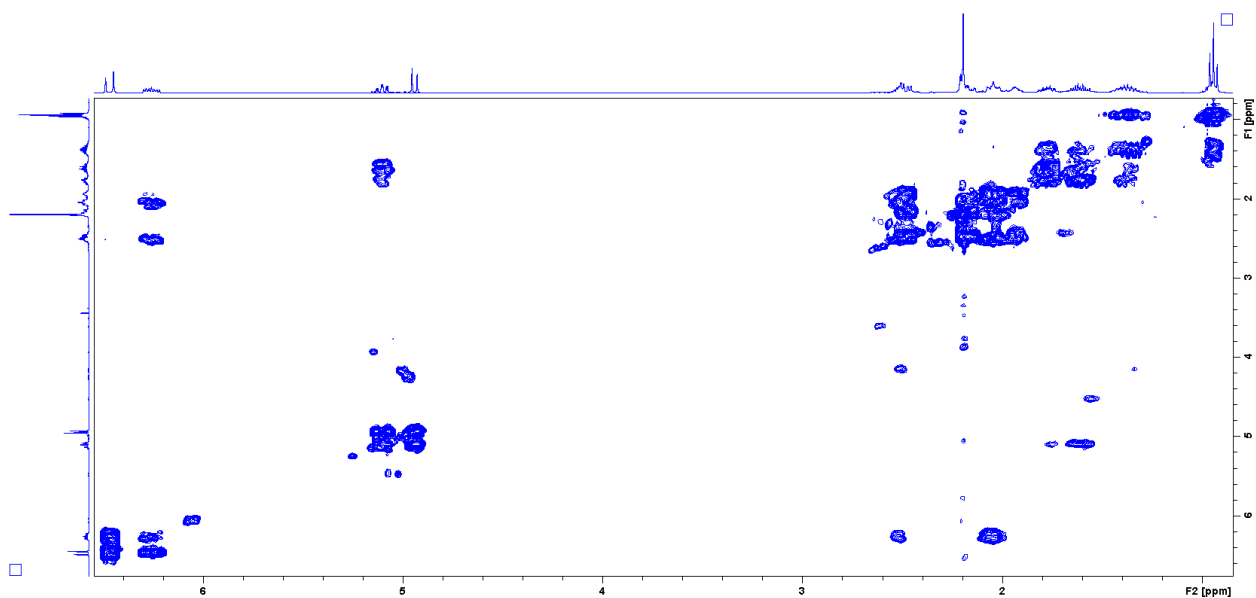

**Figure S38** – COSY spectrum of compound **10**

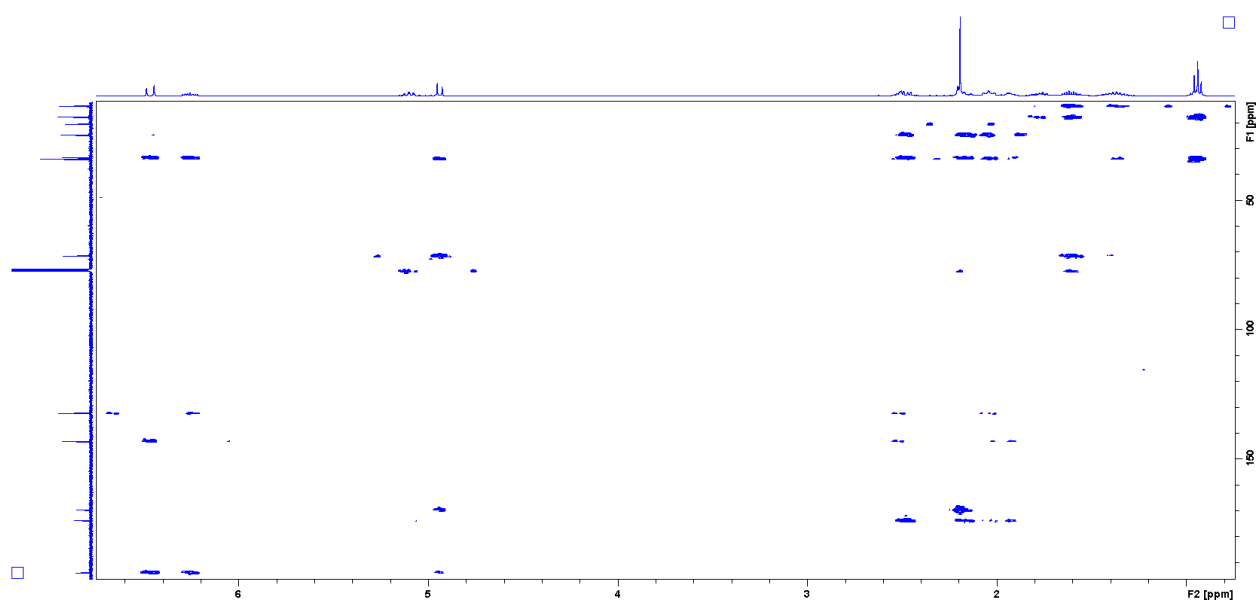

**Figure S39** – HMBC spectrum of compound **10**

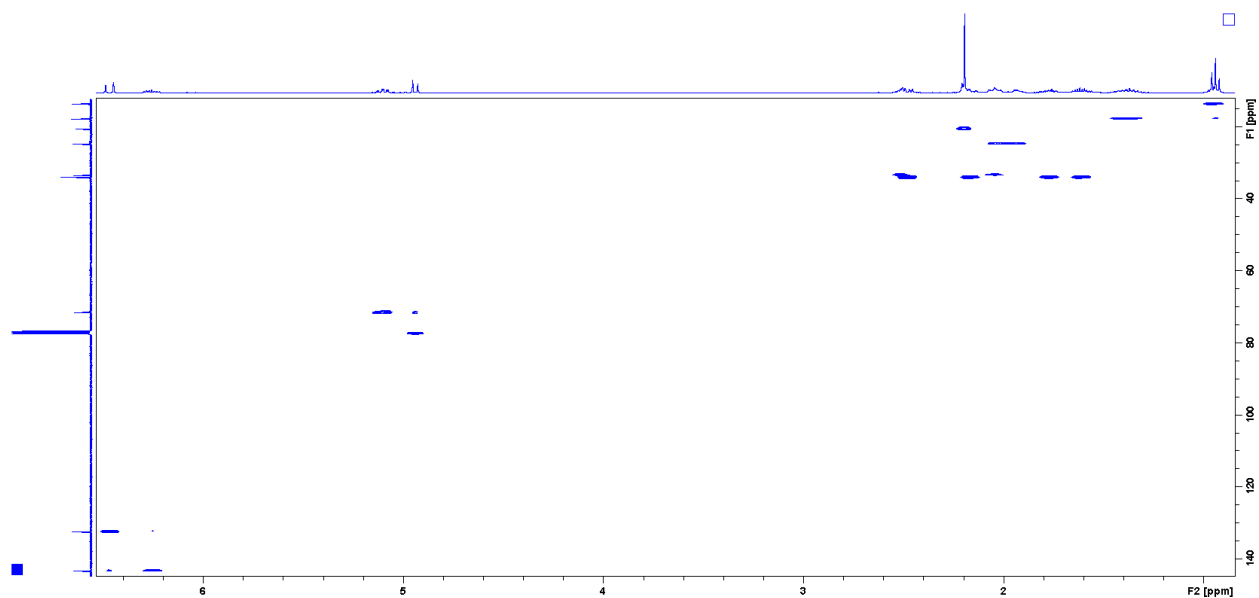

**Figure S40** – HSQC spectrum of compound **10**

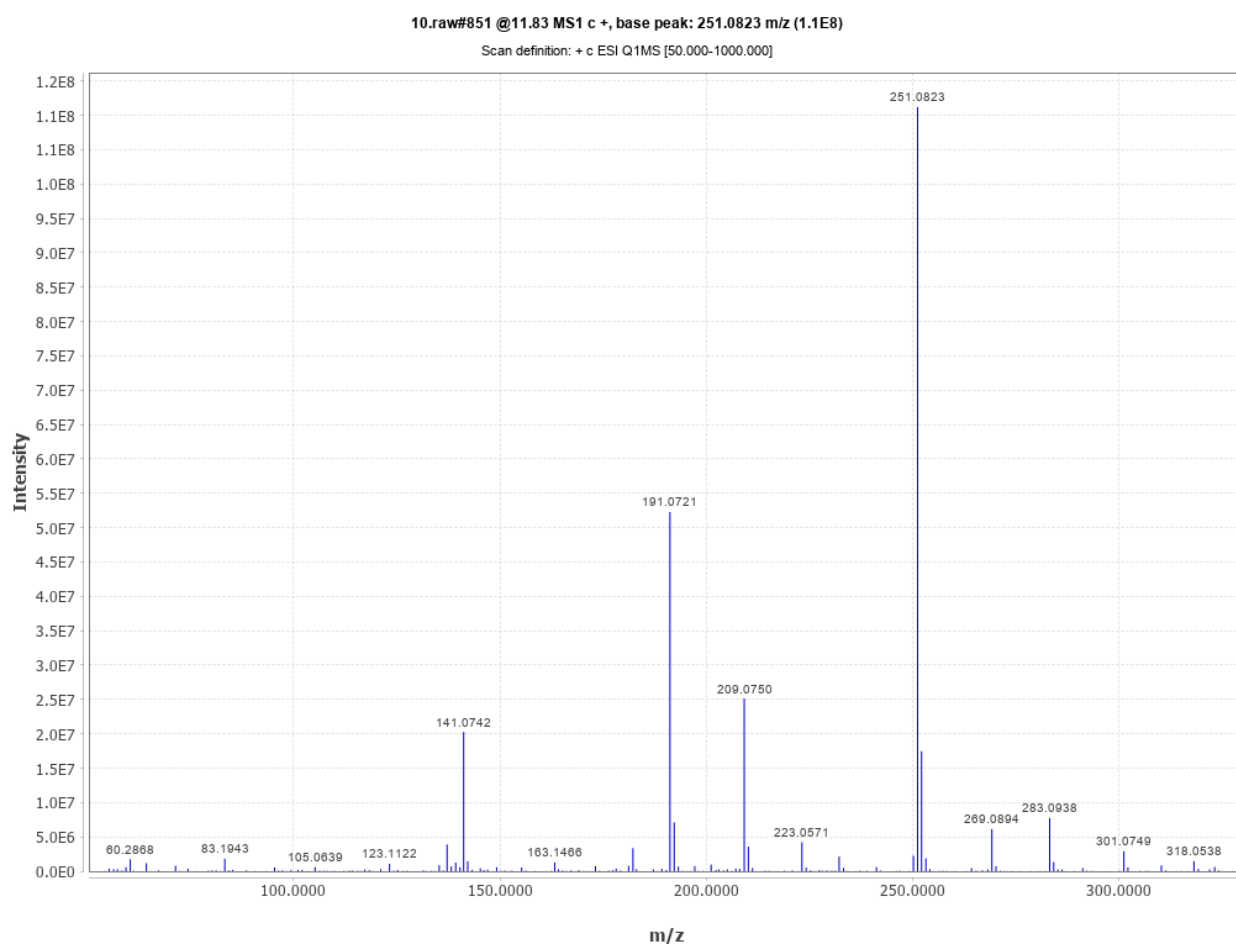

**Figure S41** – ESIMS of compound **10** recorded in positive ion mode

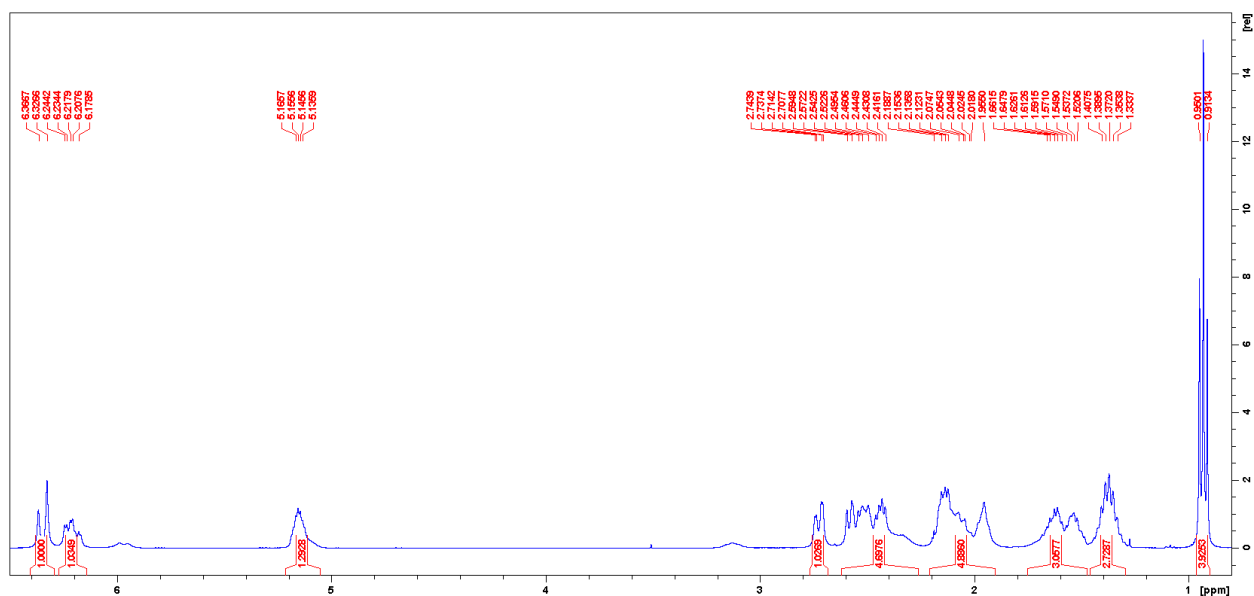

**Figure S42** –  $^1\text{H}$  NMR spectrum of compound **11**



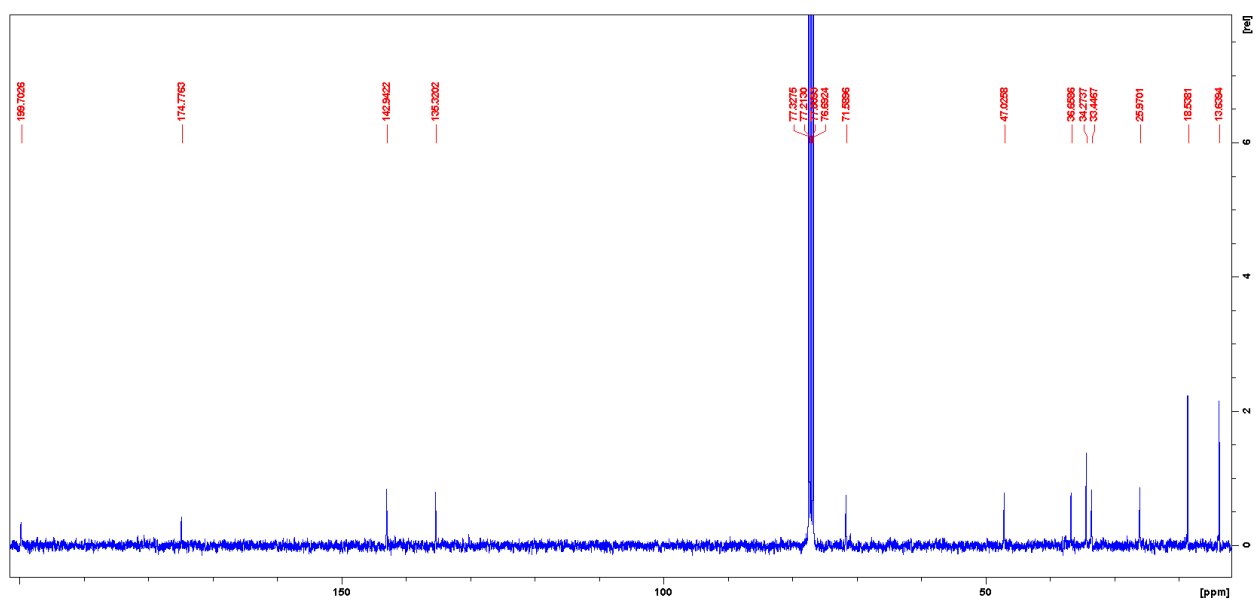

**Figure S43**  $^{13}\text{C}$  NMR spectrum of compound **11**

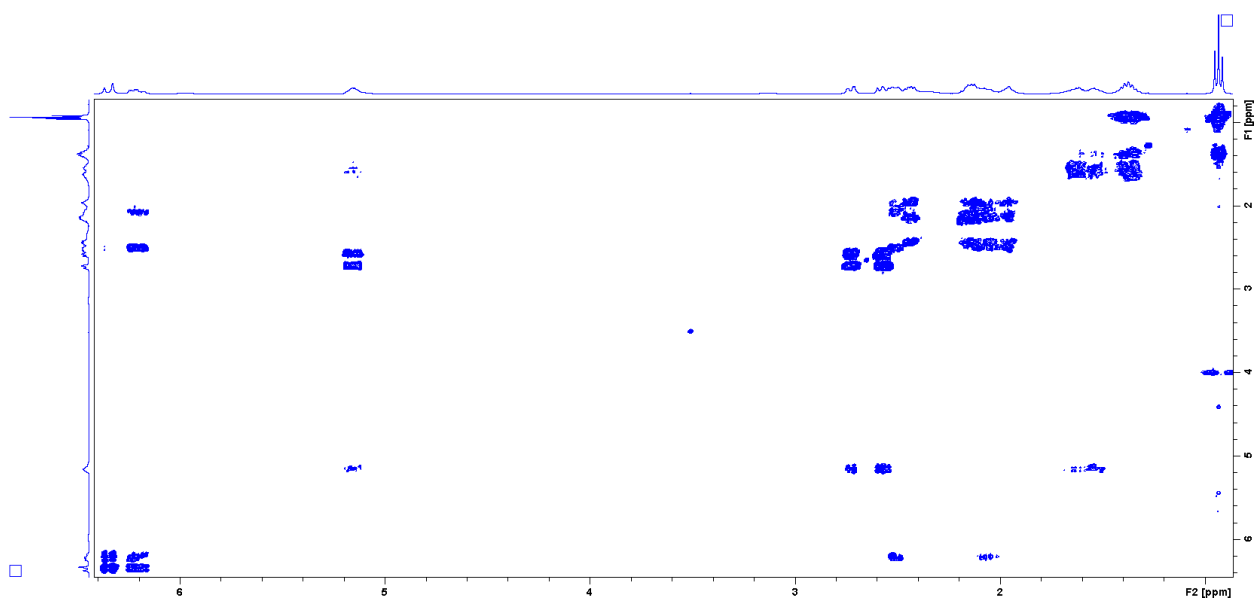

**Figure S44** – COSY spectrum of compound **11**

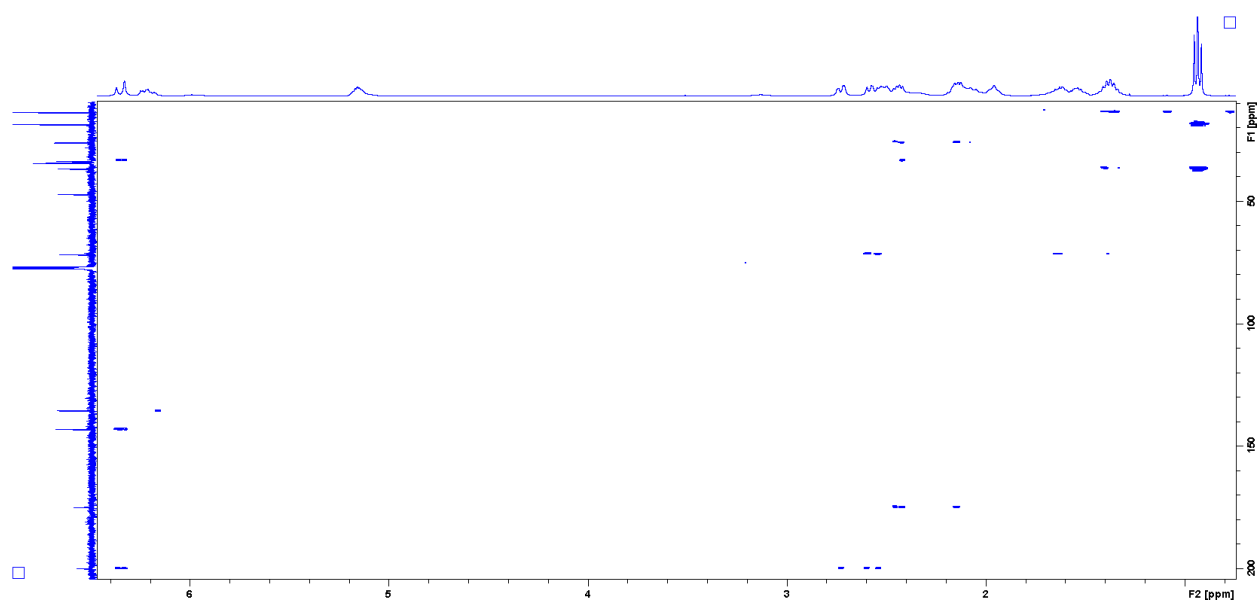

**Figure S45** – HMBC spectrum of compound **11**

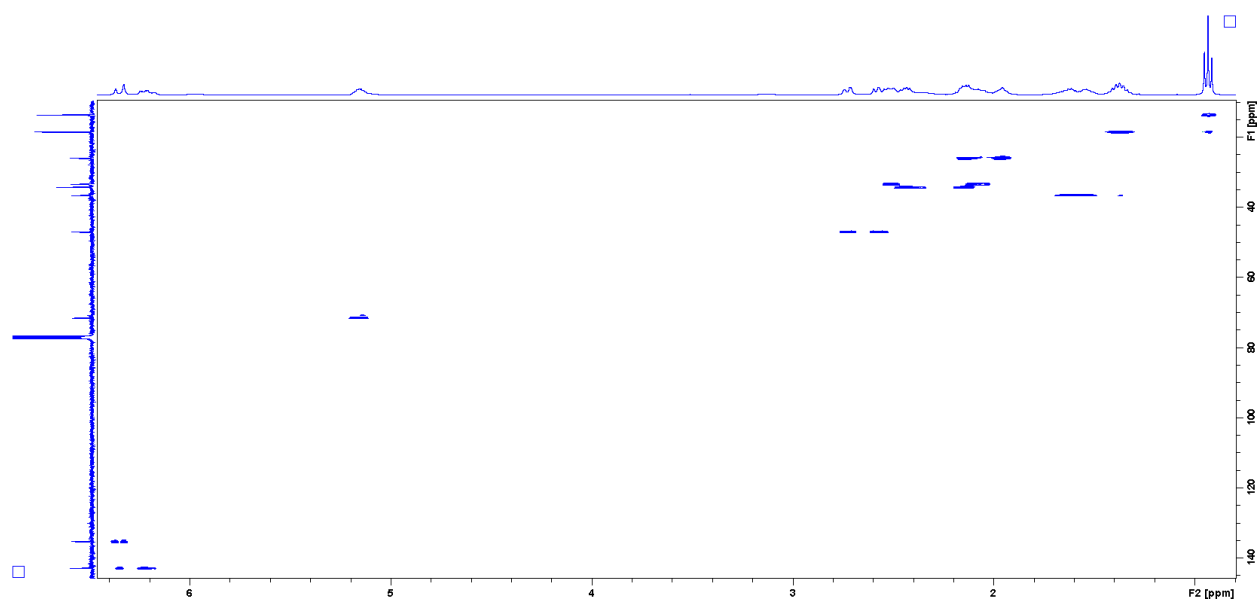

**Figure S46** – HSQC spectrum of compound **11**

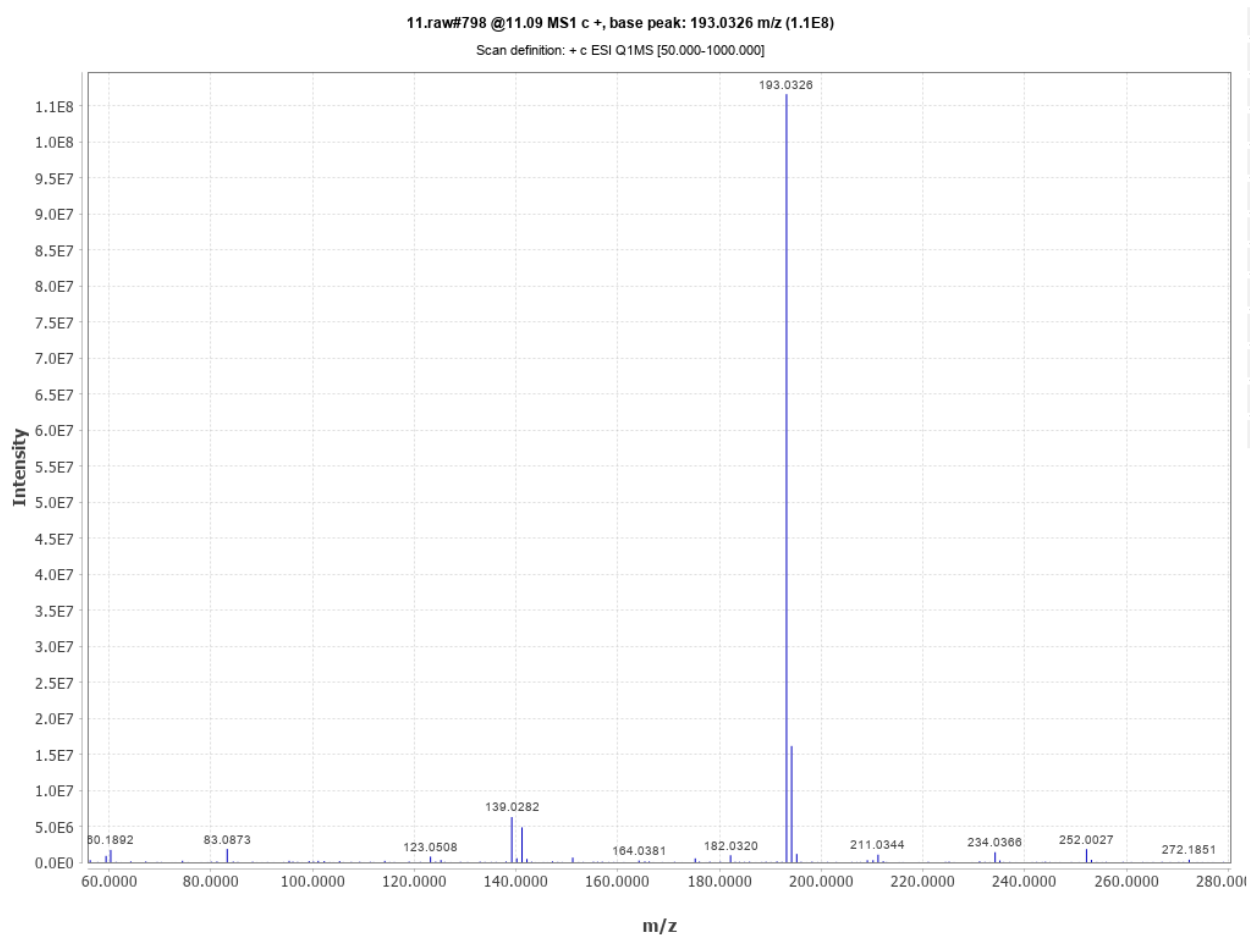

**Figure S47** – ESIMS of compound **11** recorded in positive ion mode

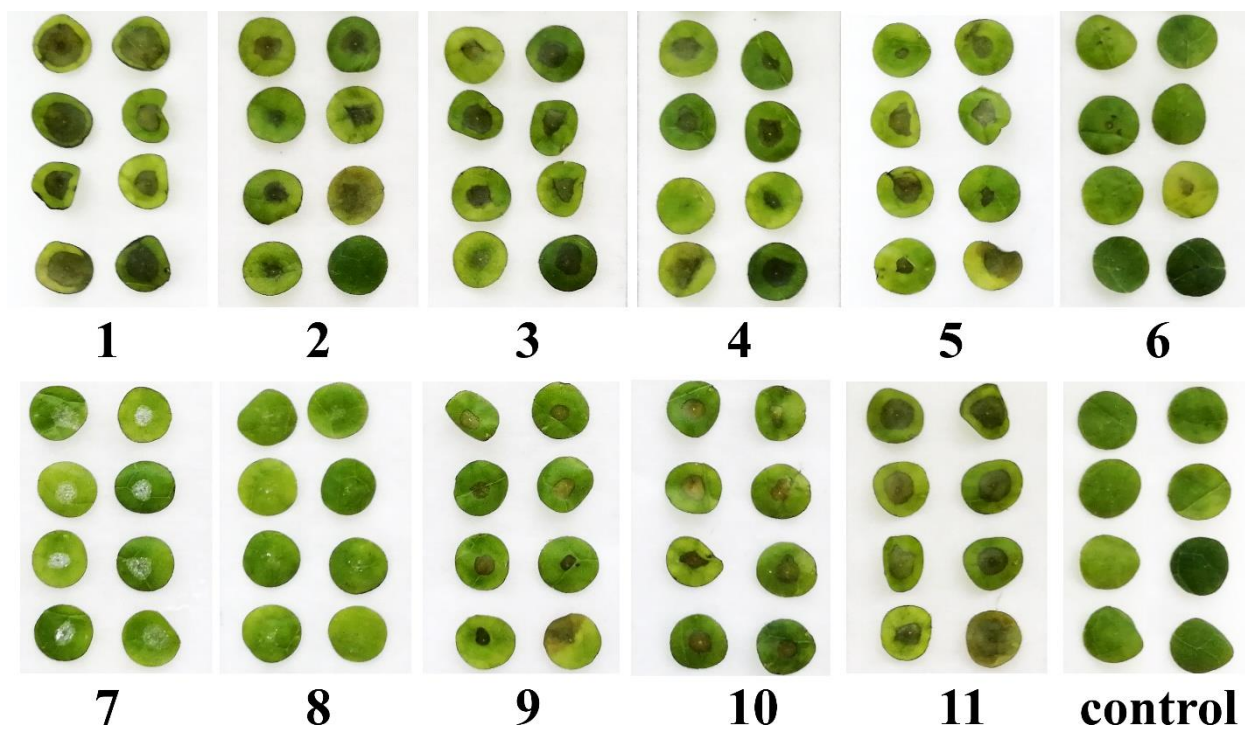

**Figure S48** – Phytotoxic activity of compounds **1** – **11** on sowthistle punctured leaf discs at 120 hours after treatment
